# Supplementary material
Source: PubMed Central journal article supplement (PMC7042891)
Supplement: jamainternmed-180-503-s001.pdf [file jamainternmed-180-503-s001.pdf]

## Supplementary Online Content

Zhong VW, Van Horn L, Greenland P, et al. Associations of processed meat, unprocessed red meat, poultry, or fish intake with incident cardiovascular disease and all-cause mortality. *JAMA Intern Med*. Published online February 3, 2020.

doi:10.1001/jamainternmed.2019.6969

**eTable 1.** Partial Correlation Coefficients Between the 4 Foods and Dietary and Other Lifestyle Factors

**eTable 2.** Key Characteristics Between the Included and Excluded Participants

**eTable 3.** Imputation Analysis for the Associations Between the 4 Foods and Incident CVD and All-Cause Mortality (n=34504)

**eTable 4.** Associations Between the 4 Foods and Incident CVD and All-Cause Mortality After Excluding Early Events and Arbitrary Truncations

**eTable 5.** Associations Between the 4 Foods and Incident CVD and All-Cause Mortality After Excluding One Cohort

**eTable 6.** Associations Between Quintiles of the Intake for Each of the 4 Foods and Incident CVD and All-Cause Mortality

**eTable 7.** Energy Density Models for the Associations Between the 4 Foods and Incident CVD and All-Cause Mortality

**eTable 8.** Associations Between the 4 Foods and Incident CVD Using Subdistribution Hazard Models

**eTable 9.** Associations of Fatty Fish or Nonfatty Fish Intake With Incident CVD and All-Cause Mortality

**eFigure 1.** Association Between Processed Meat Intake (2 vs 0 Servings/Week) and Incident CVD Among Different Subgroups

**eFigure 2.** Association Between Each Additional 2 Servings of Unprocessed Red Meat Consumed per Week and Incident CVD Among Different Subgroups

**eFigure 3.** Association Between Each Additional 2 Servings of Poultry Consumed per Week and Incident CVD Among Different Subgroups

**eFigure 4.** Association Between Each Additional 2 Servings of Fish Consumed per Week and Incident CVD Among Different Subgroups

**eFigure 5.** Association Between Each Additional 2 Servings of Processed Meat Consumed per Week and All-Cause Mortality Among Different Subgroups

**eFigure 6.** Association Between Each Additional 2 Servings of Unprocessed Red Meat Consumed per Week and All-Cause Mortality Among Different Subgroups

**eFigure 7.** Association Between Each Additional 2 Servings of Poultry Consumed per Week and All-Cause Mortality Among Different Subgroups

**eFigure 8.** Association Between Each Additional 2 Servings of Fish Consumed per Week and All-Cause Mortality Among Different Subgroups

This supplementary material has been provided by the authors to give readers additional information about their work.

eTable 1. Partial correlation coefficients between the 4 foods and dietary and other lifestyle factors

|                                | Processed meat           |         | Unprocessed red meat     |         | Poultry                  |         | Fish                     |         |
|--------------------------------|--------------------------|---------|--------------------------|---------|--------------------------|---------|--------------------------|---------|
|                                | Coefficient <sup>a</sup> | P       |
| <b>Foods and diet quality</b>  |                          |         |                          |         |                          |         |                          |         |
| Processed meat                 | --                       | --      | 0.13                     | <.001   | -0.09                    | <.001   | -0.07                    | <.001   |
| Unprocessed red meat           | 0.13                     | <.001   | --                       | --      | 0.05                     | <.001   | -0.05                    | <.001   |
| Poultry                        | -0.09                    | <.001   | 0.05                     | <.001   | --                       | --      | 0.20                     | <.001   |
| Fish                           | -0.07                    | <.001   | -0.05                    | <.001   | 0.20                     | <.001   | --                       | --      |
| Eggs                           | 0.18                     | <.001   | 0.003                    | .66     | -0.04                    | <.001   | -0.04                    | <.001   |
| Low-fat dairy products         | -0.13                    | <.001   | -0.14                    | <.001   | 0.006                    | .30     | 0.04                     | <.001   |
| High-fat dairy products        | -0.01                    | .19     | -0.06                    | <.001   | -0.08                    | <.001   | -0.08                    | <.001   |
| Whole grains                   | -0.12                    | <.001   | -0.16                    | <.001   | 0.02                     | <.001   | 0.06                     | <.001   |
| Refined grains                 | 0.03                     | <.001   | -0.001                   | .86     | -0.10                    | <.001   | -0.14                    | <.001   |
| Fruits                         | -0.15                    | <.001   | -0.17                    | <.001   | 0.05                     | <.001   | 0.13                     | <.001   |
| Vegetables excluding potatoes  | -0.11                    | <.001   | -0.05                    | <.001   | 0.16                     | <.001   | 0.24                     | <.001   |
| aHEI-2010 score <sup>b</sup>   | -0.20                    | <0.0001 | -0.18                    | <0.0001 | 0.18                     | <0.0001 | 0.34                     | <0.0001 |
| <b>Nutrients</b>               |                          |         |                          |         |                          |         |                          |         |
| Dietary cholesterol            | 0.23                     | <.001   | 0.23                     | <.001   | 0.14                     | <.001   | 0.10                     | <.001   |
| Saturated fat                  | 0.28                     | <.001   | 0.27                     | <.001   | -0.10                    | <.001   | -0.16                    | <.001   |
| Unsaturated fat                | 0.32                     | <.001   | 0.33                     | <.001   | 0.03                     | <.001   | -0.04                    | <.001   |
| Trans fat                      | 0.23                     | <.001   | 0.53                     | <.001   | 0.07                     | <.001   | 0.03                     | <.001   |
| Animal protein                 | 0.05                     | <.001   | 0.43                     | <.001   | 0.46                     | <.001   | 0.41                     | <.001   |
| Fiber                          | -0.16                    | <.001   | -0.16                    | <.001   | 0.12                     | <.001   | 0.18                     | <.001   |
| Sodium                         | 0.15                     | <.001   | 0.006                    | .32     | 0.05                     | <.001   | 0.05                     | <.001   |
| Iron                           | -0.03                    | <.001   | 0.001                    | .90     | 0.05                     | <.001   | 0.05                     | <.001   |
| <b>Other lifestyle factors</b> |                          |         |                          |         |                          |         |                          |         |
| Current smoking                | 0.09                     | <.001   | 0.03                     | <.001   | -0.08                    | <.001   | -0.04                    | <.001   |
| Smoking pack years             | 0.08                     | <.001   | 0.03                     | <.001   | -0.06                    | <.001   | -0.02                    | .001    |
| Alcohol                        | -0.02                    | .001    | -0.02                    | <.001   | -0.04                    | <.001   | -0.01                    | .26     |
| Physical activity level        | -0.06                    | <.001   | -0.07                    | <.001   | 0.02                     | <.001   | 0.07                     | <.001   |

<sup>a</sup> Adjusted for cohort, total energy intake, age, sex, and race and ethnicity.<sup>b</sup> aHEI, alternate healthy eating index. Unprocessed red meat and processed meat were excluded from the calculation.

eTable 2. Key characteristics between the included and excluded participants

|                                         | Included<br>(n=29 682) | Excluded*<br>(n=4822) |
|-----------------------------------------|------------------------|-----------------------|
| Age, mean (SD), y                       | 53.7 (15.7)            | 59.3 (15.4)           |
| Sex, No. (%)                            |                        |                       |
| Male                                    | 13 168 (44.4)          | 2193 (45.5)           |
| Female                                  | 16 514 (55.6)          | 2629 (54.5)           |
| Race and ethnicity, No. (%)             |                        |                       |
| Non-Hispanic White                      | 20 581 (69.3)          | 2898 (60.1)           |
| Non-Hispanic Black                      | 7004 (23.6)            | 1698 (35.2)           |
| Hispanic                                | 1348 (4.5)             | 141 (2.9)             |
| Chinese                                 | 731 (2.5)              | 71 (1.5)              |
| Other                                   | 18 (0.1)               | 14 (0.3)              |
| Some college or more, No. (%)           | 15 680 (52.8)          | 1994 (43.1)           |
| Current smoker, No. (%)                 | 6057 (20.4)            | 1178 (24.4)           |
| BMI, mean (SD), kg/m <sup>2</sup>       | 27.0 (5.2)             | 27.5 (5.3)            |
| Diabetes, No. (%)                       | 2570 (8.7)             | 546 (11.6)            |
| SBP, mean (SD), mm Hg                   | 123.0 (20.1)           | 129.5 (22.4)          |
| Total cholesterol, mean (SD), mg/dL     | 203.4 (40.5)           | 205.2 (42.4)          |
| Use of anti-hypertensive drugs, No. (%) | 7613 (25.6)            | 1523 (31.8)           |
| Use of lipid-lowering drugs, No. (%)    | 1659 (5.6)             | 272 (5.8)             |

BMI, body mass index; SBP, systolic blood pressure; SD, standard deviation.

\*A combination of 602 participants who had extreme energy intake (<500 or >6000 kcal/day) and 4220 participants who had missing data for one or more study variables.

eTable 3. Imputation analysis for the associations between the 4 foods and incident CVD and all-cause mortality (n=34 504)

|                      | Hazard ratio (95% CI) <sup>a</sup> | <i>P</i> |
|----------------------|------------------------------------|----------|
| Processed meat       |                                    |          |
| Incident CVD         | 1.07 (1.03-1.10)                   | <.001    |
| All-cause mortality  | 1.03 (1.02-1.04)                   | <.001    |
| Unprocessed red meat |                                    |          |
| Incident CVD         | 1.03 (1.01-1.05)                   | <.001    |
| All-cause mortality  | 1.03 (1.01-1.04)                   | .003     |
| Poultry              |                                    |          |
| Incident CVD         | 1.03 (1.00-1.05)                   | .03      |
| All-cause mortality  | 0.99 (0.97-1.01)                   | .30      |
| Fish                 |                                    |          |
| Incident CVD         | 1.01 (0.99-1.02)                   | .54      |
| All-cause mortality  | 0.99 (0.97-1.01)                   | .18      |

<sup>a</sup> Incident cardiovascular disease (CVD) included fatal and nonfatal coronary heart disease, fatal and nonfatal stroke, fatal and nonfatal heart failure, and other CVD deaths. Cohort-stratified cause-specific hazard models for incident CVD and cohort-stratified standard proportional hazards models for all-cause mortality were applied. The models were further stratified by age groups, sex, and race and ethnicity for the association between processed meat intake and all-cause mortality and further stratified by sex for the association between unprocessed red meat intake and all-cause mortality, to satisfy proportional hazards assumption. The models were adjusted for age, sex, race and ethnicity (non-Hispanic white, non-Hispanic black, Hispanic, Chinese, other), education (<high school, high school, some college or more), total energy, smoking status (current, former, never), smoking pack-years (0, 0.1-4.9, 5.0-9.9, 10-19.9, 20-29.9, 30-39.9, ≥40), cohort-specific physical activity *z* score, alcohol intake (gram), and hormone therapy (y/n). The association between processed meat intake and incident CVD was non-monotonic (*P* for non-linearity = .006) and thus a quadratic term for processed meat intake was added in addition to the original linear term. The interpretation was based on each additional 2 servings of the food consumed per week for all the associations except for the association between processed meat intake and incident CVD where the comparison was 2 vs 0 servings per week specifically. Ten imputed data sets were used.

eTable 4. Associations between the 4 foods and incident CVD and all-cause mortality after excluding early events and arbitrary truncations

|                      | Excluding events within<br>first 2 years |          | Excluding events within<br>first 5 years |          | Censoring at 10-year<br>follow up     |          | Censoring at 20-year follow<br>up     |          |
|----------------------|------------------------------------------|----------|------------------------------------------|----------|---------------------------------------|----------|---------------------------------------|----------|
|                      | Hazard ratio<br>(95% CI) <sup>a</sup>    | <i>P</i> | Hazard ratio<br>(95% CI) <sup>a</sup>    | <i>P</i> | Hazard ratio<br>(95% CI) <sup>a</sup> | <i>P</i> | Hazard ratio<br>(95% CI) <sup>a</sup> | <i>P</i> |
| Processed meat       |                                          |          |                                          |          |                                       |          |                                       |          |
| Incident CVD         | 1.06 (1.02-1.10)                         | .001     | 1.07 (1.03-1.11)                         | .001     | 1.08 (1.02-1.14)                      | .004     | 1.08 (1.04-1.12)                      | <.001    |
| All-cause mortality  | 1.03 (1.02-1.05)                         | <.001    | 1.03 (1.02-1.05)                         | <.001    | 1.04 (1.01-1.07)                      | .003     | 1.03 (1.01-1.05)                      | <.001    |
| Unprocessed red meat |                                          |          |                                          |          |                                       |          |                                       |          |
| Incident CVD         | 1.04 (1.01-1.06)                         | .003     | 1.03 (1.00-1.05)                         | .04      | 1.03 (1.00-1.07)                      | .05      | 1.03 (1.01-1.06)                      | .01      |
| All-cause mortality  | 1.02 (1.00-1.04)                         | .02      | 1.02 (1.00-1.05)                         | .03      | 1.04 (1.01-1.07)                      | .02      | 1.03 (1.01-1.05)                      | .006     |
| Poultry              |                                          |          |                                          |          |                                       |          |                                       |          |
| Incident CVD         | 1.04 (1.02-1.07)                         | .002     | 1.04 (1.01-1.07)                         | .007     | 1.04 (1.00-1.08)                      | .07      | 1.03 (1.00-1.06)                      | .03      |
| All-cause mortality  | 0.99 (0.97-1.02)                         | .52      | 0.99 (0.96-1.01)                         | .36      | 1.01 (0.97-1.05)                      | .71      | 1.00 (0.97-1.02)                      | .78      |
| Fish                 |                                          |          |                                          |          |                                       |          |                                       |          |
| Incident CVD         | 1.00 (0.98-1.02)                         | .83      | 1.00 (0.98-1.02)                         | .99      | 1.00 (0.97-1.03)                      | .97      | 1.01 (0.99-1.03)                      | .52      |
| All-cause mortality  | 0.99 (0.97-1.01)                         | .35      | 0.99 (0.97-1.01)                         | .39      | 0.95 (0.92-0.98)                      | .003     | 0.98 (0.96-1.00)                      | .09      |

<sup>a</sup> Incident cardiovascular disease (CVD) included fatal and nonfatal coronary heart disease, fatal and nonfatal stroke, fatal and nonfatal heart failure, and other CVD deaths. Cohort-stratified cause-specific hazard models for incident CVD and cohort-stratified standard proportional hazards models for all-cause mortality were applied. The models were further stratified by age groups, sex, and race and ethnicity for the association between processed meat intake and all-cause mortality and further stratified by sex for the association between unprocessed red meat intake and all-cause mortality, to satisfy proportional hazards assumption. The models were adjusted for age, sex, race and ethnicity (non-Hispanic white, non-Hispanic black, Hispanic, Chinese, other), education (<high school, high school, some college or more), total energy, smoking status (current, former, never), smoking pack-years (0, 0.1-4.9, 5.0-9.9, 10-19.9, 20-29.9, 30-39.9, ≥40), cohort-specific physical activity z score, alcohol intake (gram), hormone therapy (y/n), fruits, legumes, potatoes, other vegetables excluding legumes and potatoes, nuts and seeds, whole grains, refined grains, low-fat dairy products, high-fat dairy products, sugar-sweetened beverages, eggs, and 3 of the 4 foods (processed meat, unprocessed red meat, poultry, and fish). The association between processed meat intake and incident CVD was non-monotonic (*P* for non-linearity = .006) and thus a quadratic term for processed meat intake was added in addition to the original linear term. The interpretation was based on each additional 2 servings of the food consumed per week for all the associations except for the association between processed meat intake and incident CVD where the comparison was 2 vs 0 servings per week specifically.

eTable 5. Associations between the 4 foods and incident CVD and all-cause mortality, after excluding one cohort

| Cohort dropped       | Remaining sample size | Incident CVD             |          | All-cause mortality      |          |
|----------------------|-----------------------|--------------------------|----------|--------------------------|----------|
|                      |                       | HR (95% CI) <sup>a</sup> | <i>P</i> | HR (95% CI) <sup>a</sup> | <i>P</i> |
| Processed meat       |                       |                          |          |                          |          |
| ARIC                 | 17681                 | 1.05 (1.00-1.11)         | .05      | 1.03 (1.01-1.06)         | .004     |
| CARDIA               | 24950                 | 1.07 (1.03-1.11)         | <.001    | 1.04 (1.02-1.05)         | <.001    |
| CHS                  | 26019                 | 1.09 (1.05-1.14)         | <.001    | 1.03 (1.01-1.05)         | .003     |
| FHS                  | 29074                 | 1.07 (1.03-1.11)         | <.001    | 1.03 (1.02-1.05)         | <.001    |
| FOS                  | 27122                 | 1.06 (1.03-1.10)         | <.001    | 1.03 (1.02-1.05)         | <.001    |
| MESA                 | 23564                 | 1.07 (1.04-1.12)         | <.001    | 1.03 (1.02-1.05)         | <.001    |
| Unprocessed red meat |                       |                          |          |                          |          |
| ARIC                 | 17681                 | 1.02 (0.99-1.05)         | .30      | 1.02 (1.00-1.05)         | .11      |
| CARDIA               | 24950                 | 1.03 (1.01-1.06)         | .01      | 1.03 (1.00-1.05)         | .02      |
| CHS                  | 26019                 | 1.04 (1.02-1.07)         | .001     | 1.03 (1.00-1.05)         | .02      |
| FHS                  | 29074                 | 1.03 (1.01-1.06)         | .003     | 1.03 (1.01-1.05)         | .01      |
| FOS                  | 27122                 | 1.03 (1.01-1.05)         | .009     | 1.03 (1.01-1.05)         | .005     |
| MESA                 | 23564                 | 1.04 (1.02-1.07)         | <.001    | 1.03 (1.01-1.06)         | .001     |
| Poultry              |                       |                          |          |                          |          |
| ARIC                 | 17681                 | 1.03 (0.99-1.07)         | .11      | 0.99 (0.96-1.02)         | .48      |
| CARDIA               | 24950                 | 1.04 (1.01-1.07)         | .005     | 0.99 (0.97-1.02)         | .46      |
| CHS                  | 26019                 | 1.04 (1.00-1.07)         | .02      | 0.99 (0.96-1.02)         | .51      |
| FHS                  | 29074                 | 1.03 (1.01-1.06)         | .02      | 0.99 (0.97-1.02)         | .59      |
| FOS                  | 27122                 | 1.03 (1.00-1.06)         | .02      | 0.99 (0.97-1.01)         | .38      |
| MESA                 | 23564                 | 1.05 (1.02-1.08)         | .001     | 1.00 (0.98-1.03)         | .92      |
| Fish                 |                       |                          |          |                          |          |
| ARIC                 | 17681                 | 1.00 (0.97-1.02)         | .79      | 0.98 (0.96-1.00)         | .11      |
| CARDIA               | 24950                 | 1.00 (0.98-1.02)         | .94      | 0.99 (0.97-1.01)         | .18      |
| CHS                  | 26019                 | 1.01 (0.98-1.04)         | .34      | 0.99 (0.97-1.02)         | .64      |
| FHS                  | 29074                 | 1.01 (0.98-1.03)         | .59      | 0.99 (0.97-1.01)         | .20      |
| FOS                  | 27122                 | 1.00 (0.98-1.02)         | .83      | 0.99 (0.97-1.01)         | .16      |
| MESA                 | 23564                 | 1.00 (0.98-1.02)         | .99      | 0.99 (0.97-1.01)         | .25      |

ARIC, Atherosclerosis Risk in Communities; CARDIA, Coronary Artery Risk Development in Young Adults; CHS, Cardiovascular Health Study; CI, confidence interval; CVD, cardiovascular disease; FHS, Framingham Heart Study; FOS, Framingham Offspring Study; HR, hazard ratio; MESA, Multi-Ethnic Study of Atherosclerosis.

<sup>a</sup> There were 6963 incident CVD events and 8875 all-cause deaths in the total study sample (n=29 682). Incident CVD included fatal and nonfatal coronary heart disease, fatal and nonfatal stroke, fatal and nonfatal heart failure, and other CVD deaths. Cohort-stratified cause-specific hazard models for incident CVD and cohort-stratified standard proportional hazards models for all-cause mortality were applied. The models were further stratified by age groups, sex, and race and ethnicity for the association between processed meat intake and all-cause mortality and further stratified by sex for the association between unprocessed red meat intake and all-cause mortality, to satisfy proportional hazards assumption. The models were adjusted for age, sex, race and ethnicity (non-Hispanic white, non-Hispanic black, Hispanic, Chinese, other), education (<high school, high school, some college or more), total energy, smoking status (current, former, never), smoking pack-years (0, 0.1-4.9, 5.0-9.9, 10-19.9, 20-29.9, 30-39.9,  $\geq 40$ ), cohort-specific physical activity *z* score, alcohol intake (gram), hormone therapy (y/n), fruits, legumes, potatoes, other vegetables excluding legumes and potatoes, nuts and seeds, whole grains, refined grains, low-fat dairy products, high-fat dairy products, sugar-sweetened beverages, eggs, and 3 of the 4 foods (processed meat, unprocessed red meat, poultry, and fish). The association between processed meat intake and incident CVD was non-monotonic (*P* for non-linearity =.006) and thus a quadratic term for processed meat intake was added in addition to the original linear term. The interpretation was based on each additional 2 servings of the food consumed per week for all the associations except for the association between processed meat intake and incident CVD where the comparison was 2 vs 0 servings per week specifically.

eTable 6. Associations between quintiles of the intake for each of the 4 foods and incident CVD and all-cause mortality<sup>a</sup>

|                                         | Hazard ratio (95% confidence interval) |                      |                      |                      |                      | <i>P</i> for trend |
|-----------------------------------------|----------------------------------------|----------------------|----------------------|----------------------|----------------------|--------------------|
|                                         | Quintile 1<br>n=5936                   | Quintile 2<br>n=5937 | Quintile 3<br>n=5937 | Quintile 4<br>n=5936 | Quintile 5<br>n=5936 |                    |
| <b>Processed meat<sup>b</sup></b>       |                                        |                      |                      |                      |                      |                    |
| Incident CVD                            |                                        |                      |                      |                      |                      |                    |
| Model 1 <sup>c</sup>                    | 1.00 (Ref)                             | 1.06 (0.97-1.15)     | 1.10 (1.01-1.19)     | 1.20 (1.10-1.30)     | 1.29 (1.19-1.41)     | <.001              |
| Model 2 <sup>d</sup>                    | 1.00 (Ref)                             | 1.03 (0.94-1.12)     | 1.04 (0.96-1.14)     | 1.13 (1.04-1.22)     | 1.16 (1.07-1.26)     | <.001              |
| Model 3 <sup>e</sup>                    | 1.00 (Ref)                             | 1.03 (0.95-1.13)     | 1.05 (0.96-1.15)     | 1.13 (1.04-1.23)     | 1.16 (1.06-1.27)     | <.001              |
| All-cause mortality                     |                                        |                      |                      |                      |                      |                    |
| Model 1 <sup>c</sup>                    | 1.00 (Ref)                             | 1.00 (0.93-1.08)     | 1.06 (0.99-1.15)     | 1.12 (1.04-1.20)     | 1.29 (1.20-1.39)     | <.001              |
| Model 2 <sup>d</sup>                    | 1.00 (Ref)                             | 0.96 (0.89-1.04)     | 1.00 (0.93-1.08)     | 1.03 (0.95-1.11)     | 1.13 (1.05-1.22)     | <.001              |
| Model 3 <sup>e</sup>                    | 1.00 (Ref)                             | 0.96 (0.89-1.03)     | 0.98 (0.91-1.06)     | 1.01 (0.93-1.09)     | 1.09 (1.01-1.18)     | <.001              |
| <b>Unprocessed red meat<sup>b</sup></b> | n=5936                                 | n=5937               | n=5936               | n=5936               | n=5937               |                    |
| Incident CVD                            |                                        |                      |                      |                      |                      |                    |
| Model 1 <sup>c</sup>                    | 1.00 (Ref)                             | 1.08 (1.00-1.16)     | 1.12 (1.04-1.21)     | 1.19 (1.11-1.29)     | 1.17 (1.09-1.26)     | <.001              |
| Model 2 <sup>d</sup>                    | 1.00 (Ref)                             | 1.06 (0.98-1.14)     | 1.08 (1.00-1.16)     | 1.14 (1.06-1.23)     | 1.11 (1.03-1.20)     | .003               |
| Model 3 <sup>e</sup>                    | 1.00 (Ref)                             | 1.05 (0.97-1.14)     | 1.07 (0.99-1.15)     | 1.13 (1.05-1.22)     | 1.11 (1.02-1.20)     | .01                |
| All-cause mortality                     |                                        |                      |                      |                      |                      |                    |
| Model 1 <sup>c</sup>                    | 1.00 (Ref)                             | 1.09 (1.02-1.16)     | 1.10 (1.03-1.18)     | 1.14 (1.07-1.22)     | 1.20 (1.13-1.29)     | <.001              |
| Model 2 <sup>d</sup>                    | 1.00 (Ref)                             | 1.07 (1.00-1.14)     | 1.05 (0.98-1.13)     | 1.08 (1.01-1.16)     | 1.13 (1.06-1.21)     | <.001              |
| Model 3 <sup>e</sup>                    | 1.00 (Ref)                             | 1.06 (0.99-1.13)     | 1.04 (0.97-1.12)     | 1.07 (1.00-1.15)     | 1.13 (1.05-1.21)     | .001               |
| <b>Poultry<sup>b</sup></b>              | n=5937                                 | n=5933               | n=5939               | n=5937               | n=5936               |                    |
| Incident CVD                            |                                        |                      |                      |                      |                      |                    |
| Model 1 <sup>c</sup>                    | 1.00 (Ref)                             | 0.94 (0.87-1.01)     | 0.98 (0.91-1.06)     | 0.93 (0.86-1.00)     | 0.98 (0.91-1.06)     | .90                |
| Model 2 <sup>d</sup>                    | 1.00 (Ref)                             | 0.97 (0.90-1.05)     | 1.01 (0.93-1.09)     | 0.98 (0.91-1.06)     | 1.06 (0.98-1.15)     | .06                |
| Model 3 <sup>e</sup>                    | 1.00 (Ref)                             | 0.97 (0.90-1.05)     | 1.01 (0.94-1.09)     | 0.99 (0.92-1.07)     | 1.09 (1.00-1.18)     | .02                |
| All-cause mortality                     |                                        |                      |                      |                      |                      |                    |
| Model 1 <sup>c</sup>                    | 1.00 (Ref)                             | 0.87 (0.81-0.93)     | 0.88 (0.82-0.94)     | 0.82 (0.77-0.88)     | 0.85 (0.80-0.91)     | <.001              |
| Model 2 <sup>d</sup>                    | 1.00 (Ref)                             | 0.92 (0.86-0.98)     | 0.91 (0.85-0.97)     | 0.88 (0.83-0.94)     | 0.95 (0.89-1.02)     | .34                |
| Model 3 <sup>e</sup>                    | 1.00 (Ref)                             | 0.92 (0.86-0.98)     | 0.92 (0.86-0.98)     | 0.89 (0.84-0.96)     | 0.97 (0.91-1.04)     | .83                |
| <b>Fish<sup>b</sup></b>                 | n=5936                                 | n=5937               | n=5936               | n=5935               | n=5938               |                    |
| Incident CVD                            |                                        |                      |                      |                      |                      |                    |
| Model 1 <sup>c</sup>                    | 1.00 (Ref)                             | 1.02 (0.94-1.10)     | 0.92 (0.85-1.00)     | 0.98 (0.90-1.06)     | 0.97 (0.90-1.06)     | .64                |
| Model 2 <sup>d</sup>                    | 1.00 (Ref)                             | 1.04 (0.96-1.13)     | 0.97 (0.89-1.05)     | 1.03 (0.95-1.11)     | 1.03 (0.95-1.12)     | .50                |
| Model 3 <sup>e</sup>                    | 1.00 (Ref)                             | 1.04 (0.96-1.13)     | 0.97 (0.89-1.05)     | 1.03 (0.95-1.12)     | 1.04 (0.96-1.13)     | .31                |
| All-cause mortality                     |                                        |                      |                      |                      |                      |                    |

|                      | Hazard ratio (95% confidence interval) |                  |                  |                  |                  | <i>P</i> for trend |
|----------------------|----------------------------------------|------------------|------------------|------------------|------------------|--------------------|
|                      | Quintile 1                             | Quintile 2       | Quintile 3       | Quintile 4       | Quintile 5       |                    |
| Model 1 <sup>c</sup> | 1.00 (Ref)                             | 0.95 (0.89-1.02) | 0.88 (0.82-0.95) | 0.88 (0.82-0.95) | 0.88 (0.82-0.94) | .001               |
| Model 2 <sup>d</sup> | 1.00 (Ref)                             | 0.98 (0.91-1.05) | 0.93 (0.87-1.00) | 0.93 (0.87-1.00) | 0.93 (0.87-1.00) | .09                |
| Model 3 <sup>e</sup> | 1.00 (Ref)                             | 0.97 (0.90-1.04) | 0.93 (0.87-1.00) | 0.94 (0.87-1.01) | 0.95 (0.88-1.02) | .30                |

<sup>a</sup> There were 6963 incident cardiovascular disease (CVD) events and 8875 all-cause deaths (n=29 682). Incident CVD included fatal and nonfatal coronary heart disease, fatal and nonfatal stroke, fatal and nonfatal heart failure, and other CVD deaths. Cohort-stratified cause-specific hazard models for incident CVD and cohort-stratified standard proportional hazards models for all-cause mortality were applied. The models were further stratified by age groups, sex, and race and ethnicity for the association between processed meat intake and all-cause mortality and further stratified by sex for the association between unprocessed red meat intake and all-cause mortality, to satisfy proportional hazards assumption.

<sup>b</sup> The unit of the 4 foods was converted into serving/day/1000 kcal before modeling. The median consumption from Quintile 1 to Quintile 5 was 0, 0.06, 0.13, 0.24 and 0.50 serving/day/1000 kcal for processed meat; 0.07, 0.16, 0.25, 0.35, and 0.54 serving/day/1000 kcal for unprocessed red meat; 0.04, 0.09, 0.16, 0.25, and 0.42 serving/day/1000 kcal for poultry; and 0.02, 0.08, 0.14, 0.24, and 0.47 serving/day/1000 kcal for fish.

<sup>c</sup> Model 1: age, sex, race and ethnicity (non-Hispanic white, non-Hispanic black, Hispanic, Chinese, other), and education (<high school, high school, some college or more).

<sup>d</sup> Model 2: Model 1 plus total energy, smoking status (current, former, never), smoking pack-years (0, 0.1-4.9, 5.0-9.9, 10-19.9, 20-29.9, 30-39.9, ≥40), cohort-specific physical activity z score, alcohol intake (gram), and use of hormone therapy (y/n).

<sup>e</sup> Model 3: Model 2 plus fruits, legumes, potatoes, other vegetables excluding legumes and potatoes, nuts and seeds, whole grains, refined grains, low-fat dairy products, high-fat dairy products, sugar-sweetened beverages, eggs, and 3 of the 4 foods (processed meat, unprocessed red meat, poultry, and fish); a term of processed meat squared was additionally adjusted when analyzing the incident CVD outcome.

eTable 7. Energy density models for the associations between the 4 foods and incident CVD and all-cause mortality

|                      | Hazard ratio (95% CI) <sup>a</sup> | <i>P</i> |
|----------------------|------------------------------------|----------|
| Processed meat       |                                    |          |
| Incident CVD         | 1.03 (1.02-1.05)                   | <.001    |
| All-cause mortality  | 1.03 (1.02-1.05)                   | <.001    |
| Unprocessed red meat |                                    |          |
| Incident CVD         | 1.04 (1.02-1.06)                   | <.001    |
| All-cause mortality  | 1.03 (1.02-1.05)                   | <.001    |
| Poultry              |                                    |          |
| Incident CVD         | 1.03 (1.01-1.05)                   | .009     |
| All-cause mortality  | 1.00 (0.98-1.02)                   | .83      |
| Fish                 |                                    |          |
| Incident CVD         | 1.00 (0.99-1.02)                   | .68      |
| All-cause mortality  | 0.99 (0.98-1.01)                   | .43      |

<sup>a</sup> The unit of the 4 foods was converted into serving/day/1000 kcal before modeling. There were 6963 incident cardiovascular disease (CVD) events and 8875 all-cause deaths (n=29 682). Incident CVD included fatal and nonfatal coronary heart disease, fatal and nonfatal stroke, fatal and nonfatal heart failure, and other CVD deaths. Cohort-stratified cause-specific hazard models for incident CVD and cohort-stratified standard proportional hazards models for all-cause mortality were applied. The models were further stratified by age groups, sex, and race and ethnicity for the association between processed meat intake and all-cause mortality and further stratified by sex for the association between unprocessed red meat intake and all-cause mortality, to satisfy proportional hazards assumption. The models were adjusted for age, sex, race and ethnicity (non-Hispanic white, non-Hispanic black, Hispanic, Chinese, other), education (<high school, high school, some college or more), total energy, smoking status (current, former, never), smoking pack-years (0, 0.1-4.9, 5.0-9.9, 10-19.9, 20-29.9, 30-39.9, ≥40), cohort-specific physical activity *z* score, alcohol intake (gram), hormone therapy (y/n), fruits, legumes, potatoes, other vegetables excluding legumes and potatoes, nuts and seeds, whole grains, refined grains, low-fat dairy products, high-fat dairy products, sugar-sweetened beverages, eggs, and 3 of the 4 foods (processed meat, unprocessed red meat, poultry, and fish). All associations were monotonic (*P* value for non-linearity >.05). The interpretation was based on each additional 2 servings of the food consumed per week for all the associations, at daily energy consumption level of 2000 kcal.

eTable 8. Associations between the 4 foods and incident CVD, using subdistribution hazard models<sup>a</sup>

|                      | Hazard ratio (95% CI) <sup>b</sup> | <i>P</i> |
|----------------------|------------------------------------|----------|
| Processed meat       | 1.07 (1.04-1.12)                   | <.001    |
| Unprocessed red meat | 1.02 (0.99-1.04)                   | .18      |
| Poultry              | 1.04 (1.01-1.06)                   | .01      |
| Fish                 | 1.01 (0.99-1.03)                   | .31      |

<sup>a</sup> There is no competing risk for all-cause mortality, so we only evaluated incident cardiovascular disease (CVD) using subdistribution hazard models.

<sup>b</sup> There were 6963 incident CVD events. Incident CVD included fatal and nonfatal coronary heart disease, fatal and nonfatal stroke, fatal and nonfatal heart failure, and other CVD deaths. Cohort-stratified subdistribution hazard models were applied. The models were adjusted for age, sex, race and ethnicity (non-Hispanic white, non-Hispanic black, Hispanic, Chinese, other), education (<high school, high school, some college or more), total energy, smoking status (current, former, never), smoking pack-years (0, 0.1-4.9, 5.0-9.9, 10-19.9, 20-29.9, 30-39.9, ≥40), cohort-specific physical activity *z* score, alcohol intake (gram), hormone therapy (y/n), fruits, legumes, potatoes, other vegetables excluding legumes and potatoes, nuts and seeds, whole grains, refined grains, low-fat dairy products, high-fat dairy products, sugar-sweetened beverages, eggs, and 3 of the 4 foods (processed meat, unprocessed red meat, poultry, and fish). The association between processed meat intake and incident CVD was non-monotonic (*P* value for non-linearity =.0005) and thus a quadratic term for processed meat intake was added in addition to the original linear term. The interpretation was based on each additional 2 servings of the food consumed per week for all the associations except for the association between processed meat intake and incident CVD where the comparison was 2 vs 0 servings per week specifically.

eTable 9. Associations of fatty fish or nonfatty fish intake with incident CVD and all-cause mortality

|               | Incident CVD                       |          | All-cause mortality                |          |
|---------------|------------------------------------|----------|------------------------------------|----------|
|               | Hazard ratio (95% CI) <sup>a</sup> | <i>P</i> | Hazard ratio (95% CI) <sup>a</sup> | <i>P</i> |
| Fatty fish    | 1.01 (0.97-1.05)                   | .51      | 0.99 (0.95-1.02)                   | .43      |
| Nonfatty fish | 1.01 (0.97-1.04)                   | .76      | 0.99 (0.96-1.03)                   | .73      |

<sup>a</sup> There were 6963 incident cardiovascular disease (CVD) events and 8875 all-cause deaths (n=29 682). Incident CVD included fatal and nonfatal coronary heart disease, fatal and nonfatal stroke, fatal and nonfatal heart failure, and other CVD deaths. Cohort-stratified cause-specific hazard models for incident CVD and cohort-stratified standard proportional hazards models for all-cause mortality were applied. The models were adjusted for age, sex, race and ethnicity (non-Hispanic white, non-Hispanic black, Hispanic, Chinese, other), education (<high school, high school, some college or more), total energy, smoking status (current, former, never), smoking pack-years (0, 0.1-4.9, 5.0-9.9, 10-19.9, 20-29.9, 30-39.9, ≥40), cohort-specific physical activity *z* score, alcohol intake (gram), hormone therapy (y/n), fruits, legumes, potatoes, other vegetables excluding legumes and potatoes, nuts and seeds, whole grains, refined grains, low-fat dairy products, high-fat dairy products, sugar-sweetened beverages, eggs, processed meat, processed meat squared (for incident CVD only), unprocessed red meat, and poultry. The interpretation was based on each additional 2 servings of fish consumed per week.

eFigure 1. Association between processed meat consumed (2 vs 0 servings/week) and incident CVD among different subgroups

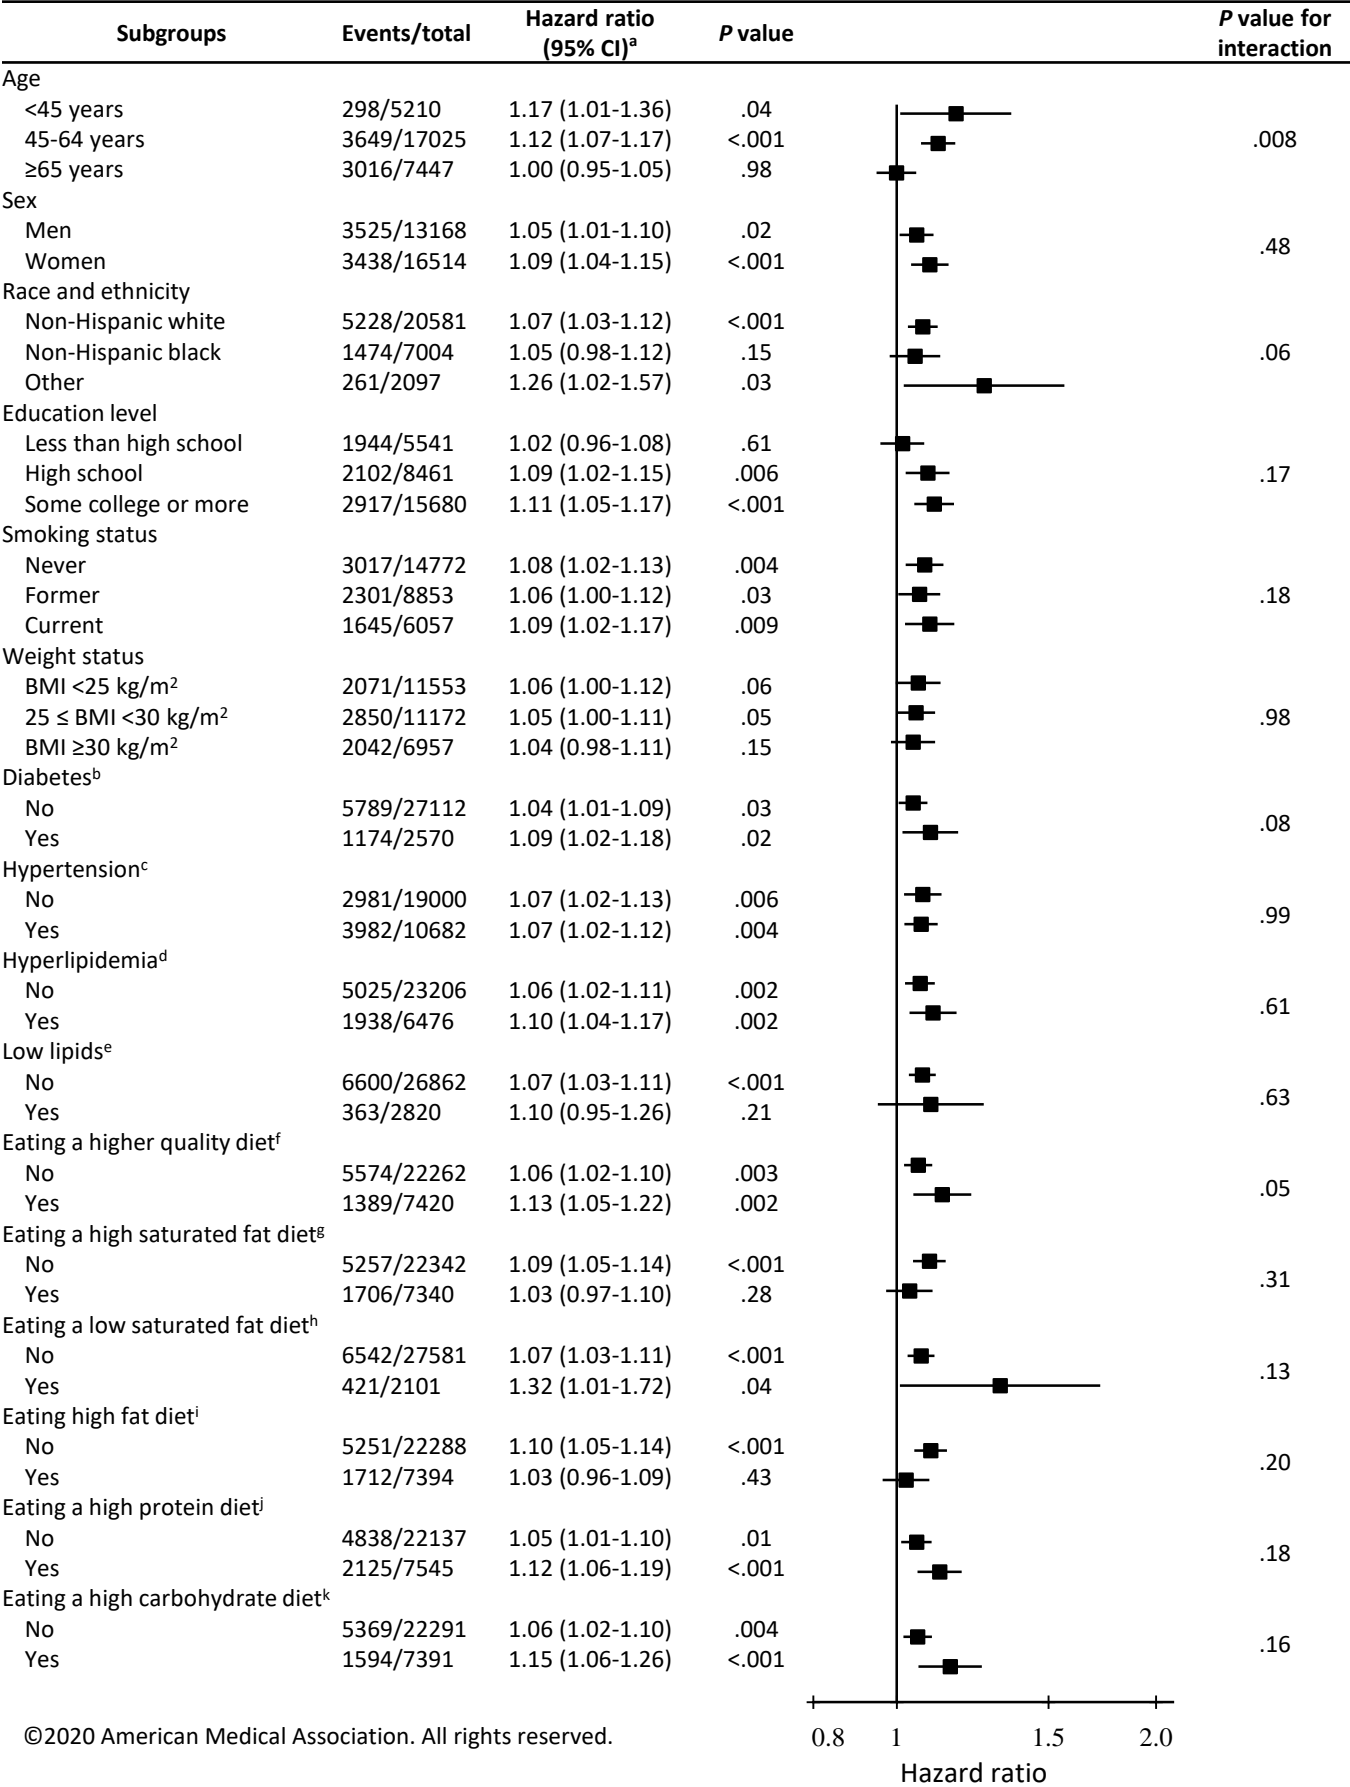

BMI, body mass index; CI, confidence interval; CVD, cardiovascular disease.

<sup>a</sup> Cohort-stratified cause-specific hazard models were used. Incident CVD included fatal and nonfatal coronary heart disease, fatal and nonfatal stroke, fatal and nonfatal heart failure, and other CVD deaths. Adjustment covariates included age, sex, race and ethnicity (non-Hispanic white, non-Hispanic black, Hispanic, Chinese, other), education (<high school, high school, some college or more), total energy, smoking status (current, former, never), smoking pack-years (0, 0.1-4.9, 5.0-9.9, 10-19.9, 20-29.9, 30-39.9,  $\geq 40$ ), cohort-specific physical activity z score, alcohol intake (gram), hormone therapy (y/n), fruits, legumes, potatoes, other vegetables excluding legumes and potatoes, nuts and seeds, whole grains, refined grains, low-fat dairy products, high-fat dairy products, sugar-sweetened beverages, eggs, unprocessed red meat, poultry, and fish, where relevant.

<sup>b</sup> Fasting glucose  $\geq 126$  mg/dL or HbA1c  $\geq 6.5\%$  or taking glucose-lowering drugs.

<sup>c</sup> Blood pressure  $\geq 140/90$  mm Hg or taking antihypertensive drugs.

<sup>d</sup> Total cholesterol  $\geq 240$  mg/dL or taking lipid-lowering drugs.

<sup>e</sup> Low density lipoprotein cholesterol  $< 70$  mg/dL or non-high density lipoprotein cholesterol  $< 100$  mg/dL, among those who did not take lipid-lowering drugs.

<sup>f</sup> Alternate Healthy Eating Index 2010 score in the highest quartile (a score of 51.1 or higher). The original version of the aHEI-2010 score has a range of 0-110 points. The aHEI-2010 score in this study had a range of 0-100 points due to the removal of the meat item.

<sup>g</sup> Percent of energy consumed from saturated fat in the highest quartile (14% or higher).

<sup>h</sup> Percent of energy consumed from saturated fat  $< 7\%$ .

<sup>i</sup> Percent of energy consumed from fat in the highest quartile (37.9% or higher).

<sup>j</sup> Percent of energy consumed from protein in the highest quartile (18.9% or higher).

<sup>j</sup> Percent of energy consumed from carbohydrates in the highest quartile (55.4% or higher).

eFigure 2. Association between each additional 2 servings of unprocessed red meat consumed per week and incident CVD among different subgroups

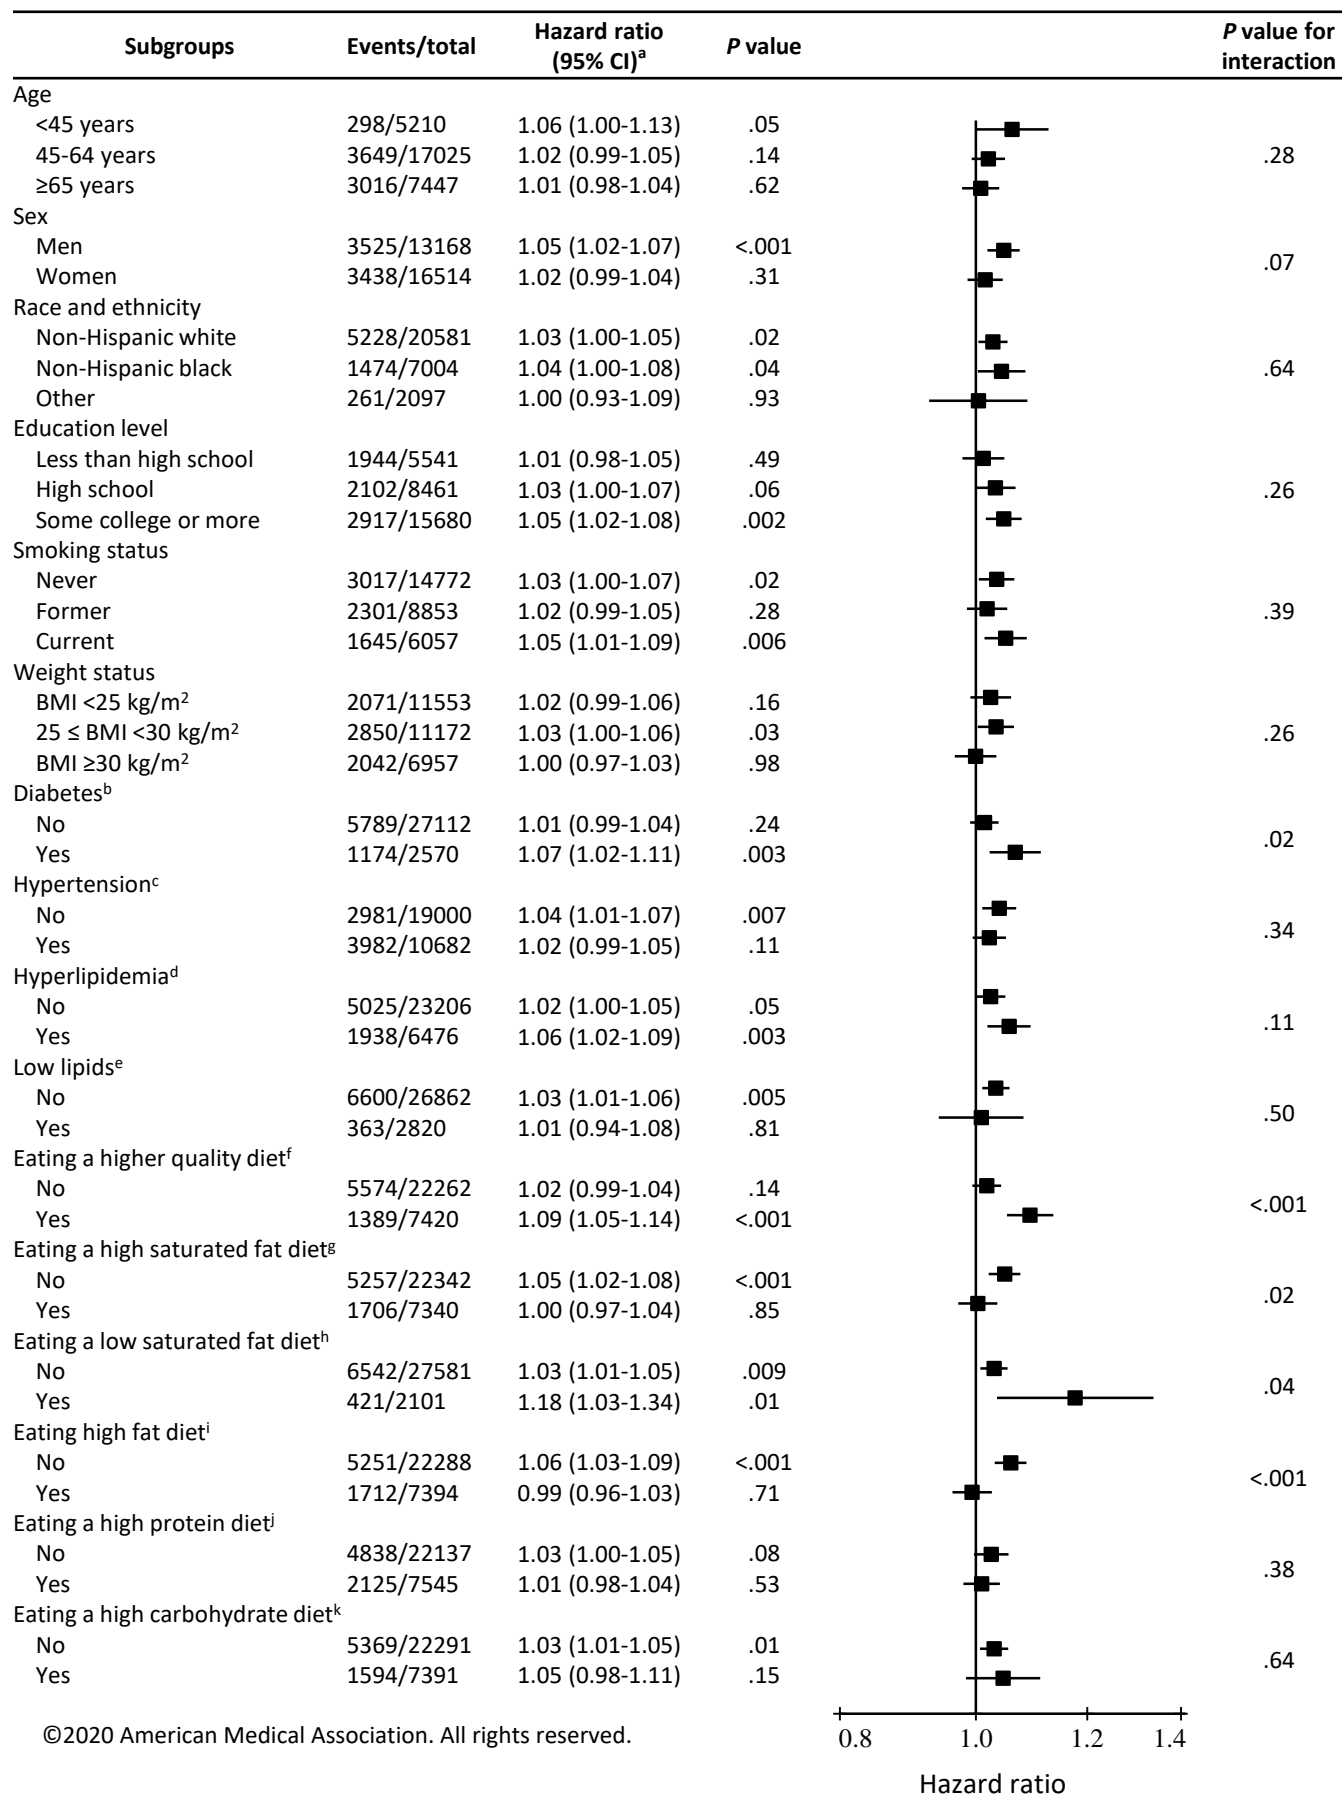

BMI, body mass index; CI, confidence interval; CVD, cardiovascular disease.

<sup>a</sup> Cohort-stratified cause-specific hazard models were used. Incident CVD included fatal and nonfatal coronary heart disease, fatal and nonfatal stroke, fatal and nonfatal heart failure, and other CVD deaths. Adjustment covariates included age, sex, race and ethnicity (non-Hispanic white, non-Hispanic black, Hispanic, Chinese, other), education (<high school, high school, some college or more), total energy, smoking status (current, former, never), smoking pack-years (0, 0.1-4.9, 5.0-9.9, 10-19.9, 20-29.9, 30-39.9,  $\geq 40$ ), cohort-specific physical activity z score, alcohol intake (gram), hormone therapy (y/n), fruits, legumes, potatoes, other vegetables excluding legumes and potatoes, nuts and seeds, whole grains, refined grains, low-fat dairy products, high-fat dairy products, sugar-sweetened beverages, eggs, processed meat, processed meat squared, poultry, and fish, where relevant.

<sup>b</sup> Fasting glucose  $\geq 126$  mg/dL or HbA1c  $\geq 6.5\%$  or taking glucose-lowering drugs.

<sup>c</sup> Blood pressure  $\geq 140/90$  mm Hg or taking antihypertensive drugs.

<sup>d</sup> Total cholesterol  $\geq 240$  mg/dL or taking lipid-lowering drugs.

<sup>e</sup> Low density lipoprotein cholesterol  $< 70$  mg/dL or non-high density lipoprotein cholesterol  $< 100$  mg/dL, among those who did not take lipid-lowering drugs.

<sup>f</sup> Alternate Healthy Eating Index 2010 score in the highest quartile (a score of 51.1 or higher). The original version of the aHEI-2010 score has a range of 0-110 points. The aHEI-2010 score in this study had a range of 0-100 points due to the removal of the meat item.

<sup>g</sup> Percent of energy consumed from saturated fat in the highest quartile (14% or higher).

<sup>h</sup> Percent of energy consumed from saturated fat  $< 7\%$ .

<sup>i</sup> Percent of energy consumed from fat in the highest quartile (37.9% or higher).

<sup>j</sup> Percent of energy consumed from protein in the highest quartile (18.9% or higher).

<sup>k</sup> Percent of energy consumed from carbohydrates in the highest quartile (55.4% or higher).

eFigure 3. Association between each additional 2 servings of poultry consumed per week and incident CVD among different subgroups

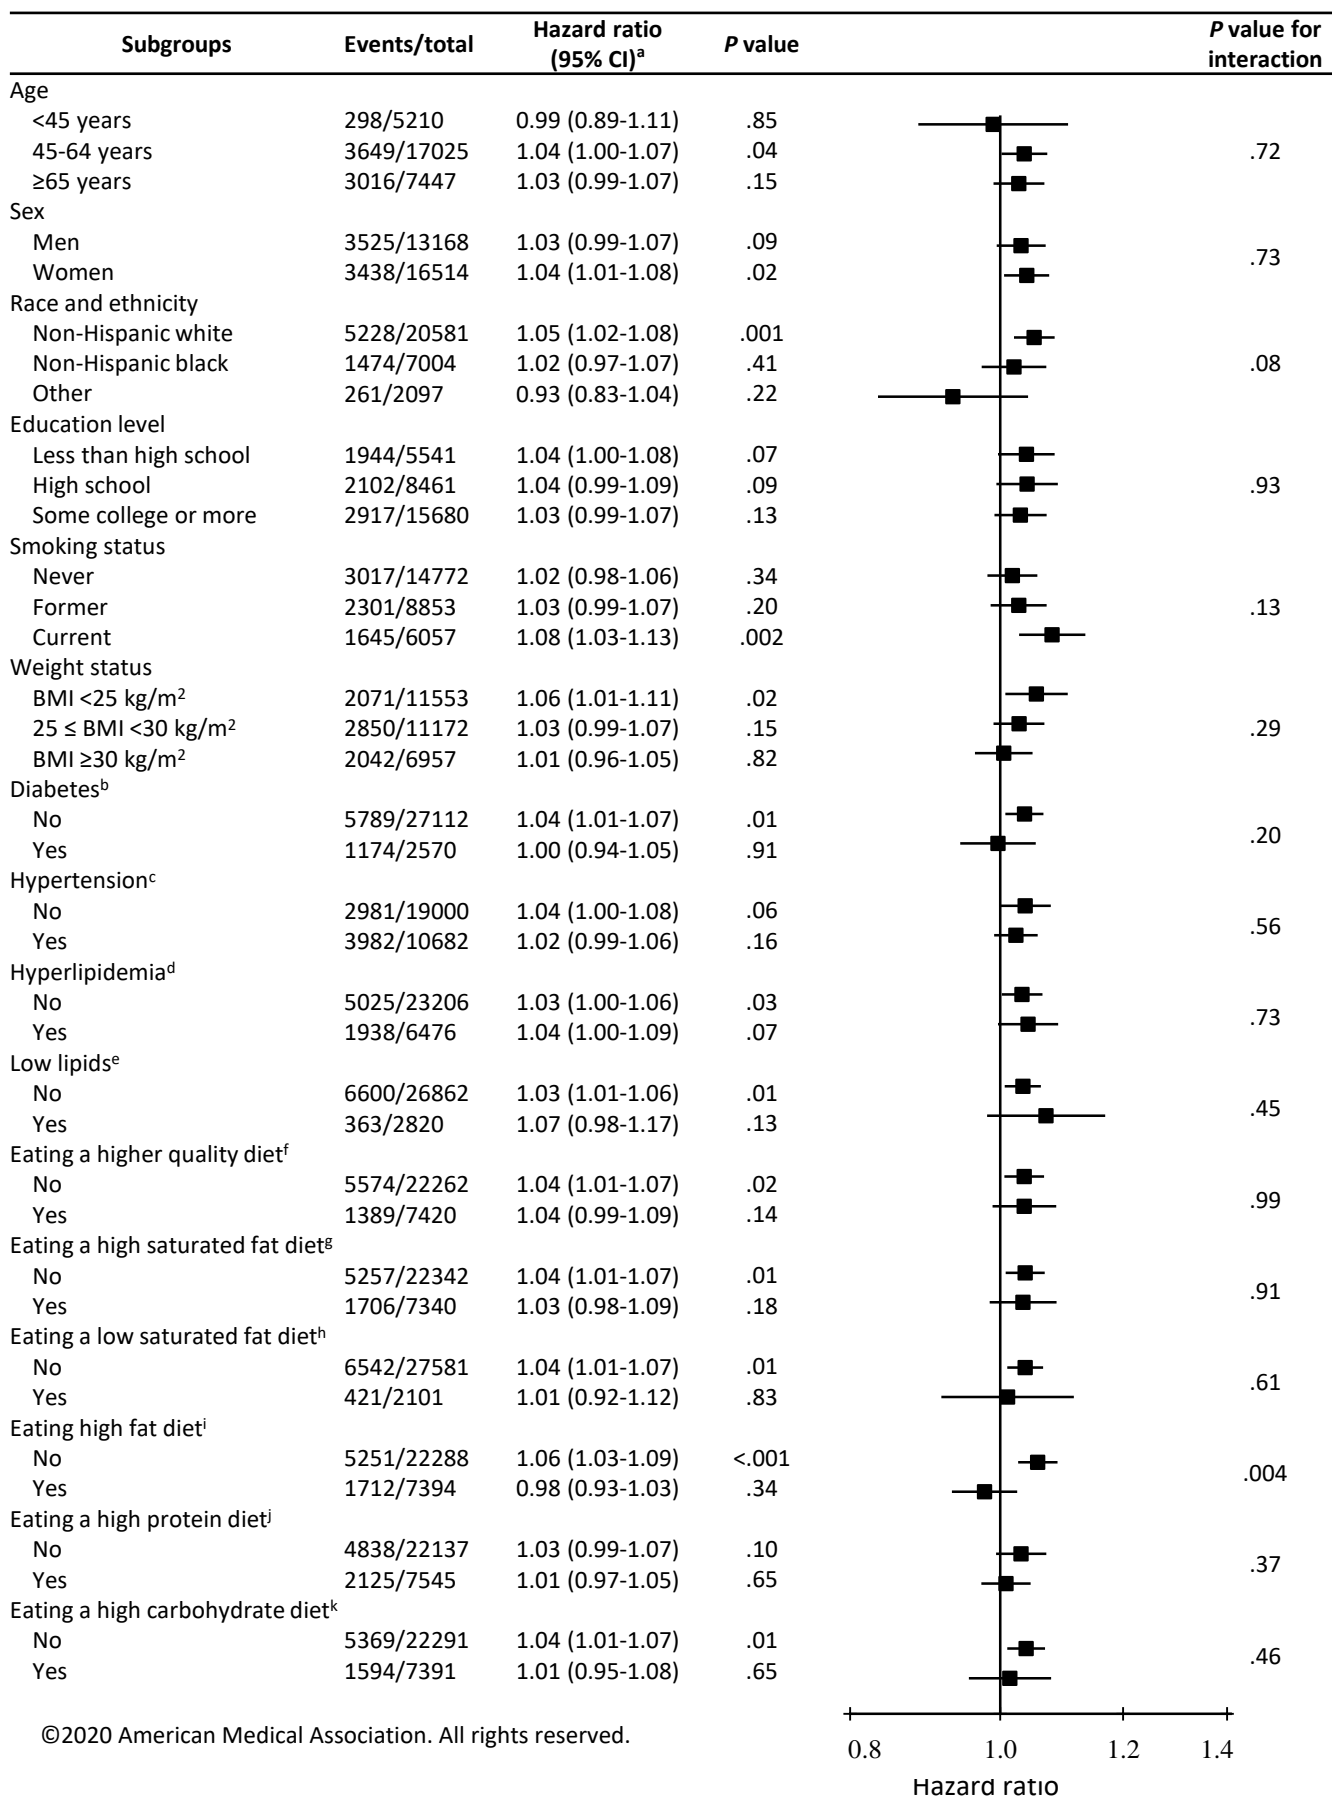

BMI, body mass index; CI, confidence interval; CVD, cardiovascular disease.

<sup>a</sup> Cohort-stratified cause-specific hazard models were used. Incident CVD included fatal and nonfatal coronary heart disease, fatal and nonfatal stroke, fatal and nonfatal heart failure, and other CVD deaths. Adjustment covariates included age, sex, race and ethnicity (non-Hispanic white, non-Hispanic black, Hispanic, Chinese, other), education (<high school, high school, some college or more), total energy, smoking status (current, former, never), smoking pack-years (0, 0.1-4.9, 5.0-9.9, 10-19.9, 20-29.9, 30-39.9,  $\geq 40$ ), cohort-specific physical activity z score, alcohol intake (gram), hormone therapy (y/n), fruits, legumes, potatoes, other vegetables excluding legumes and potatoes, nuts and seeds, whole grains, refined grains, low-fat dairy products, high-fat dairy products, sugar-sweetened beverages, eggs, processed meat, processed meat squared, unprocessed red meat, and fish, where relevant.

<sup>b</sup> Fasting glucose  $\geq 126$  mg/dL or HbA1c  $\geq 6.5\%$  or taking glucose-lowering drugs.

<sup>c</sup> Blood pressure  $\geq 140/90$  mm Hg or taking antihypertensive drugs.

<sup>d</sup> Total cholesterol  $\geq 240$  mg/dL or taking lipid-lowering drugs.

<sup>e</sup> Low density lipoprotein cholesterol  $< 70$  mg/dL or non-high density lipoprotein cholesterol  $< 100$  mg/dL, among those who did not take lipid-lowering drugs.

<sup>f</sup> Alternate Healthy Eating Index 2010 score in the highest quartile (a score of 51.1 or higher). The original version of the aHEI-2010 score has a range of 0-110 points. The aHEI-2010 score in this study had a range of 0-100 points due to the removal of the meat item.

<sup>g</sup> Percent of energy consumed from saturated fat in the highest quartile (14% or higher).

<sup>h</sup> Percent of energy consumed from saturated fat  $< 7\%$ .

<sup>i</sup> Percent of energy consumed from fat in the highest quartile (37.9% or higher).

<sup>j</sup> Percent of energy consumed from protein in the highest quartile (18.9% or higher).

<sup>k</sup> Percent of energy consumed from carbohydrates in the highest quartile (55.4% or higher).

eFigure 4. Association between each additional 2 servings of fish consumed per week and incident CVD among different subgroups

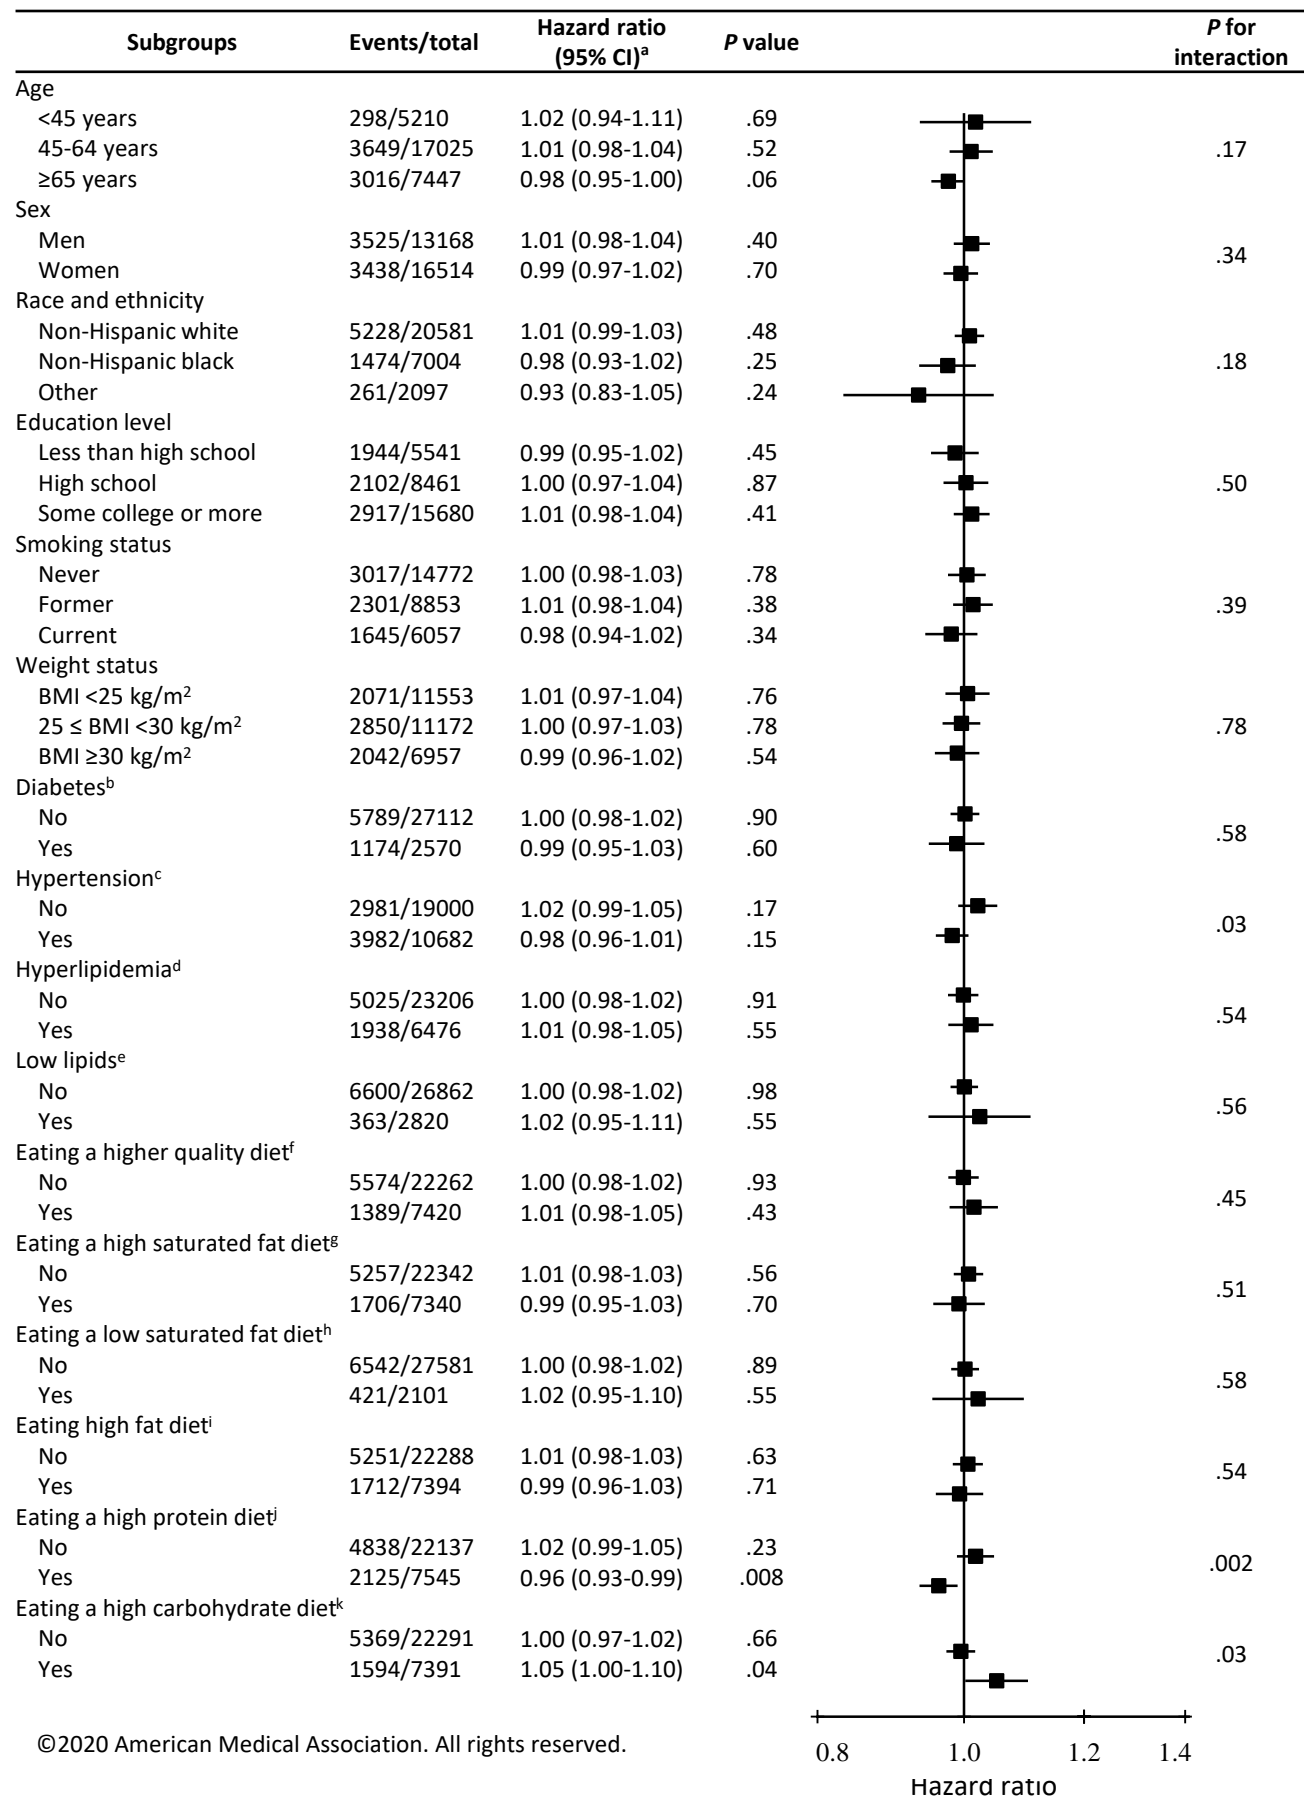

BMI, body mass index; CI, confidence interval; CVD, cardiovascular disease.

<sup>a</sup> Cohort-stratified cause-specific hazard models were used. Incident CVD included fatal and nonfatal coronary heart disease, fatal and nonfatal stroke, fatal and nonfatal heart failure, and other CVD deaths. Adjustment covariates included age, sex, race and ethnicity (non-Hispanic white, non-Hispanic black, Hispanic, Chinese, other), education (<high school, high school, some college or more), total energy, smoking status (current, former, never), smoking pack-years (0, 0.1-4.9, 5.0-9.9, 10-19.9, 20-29.9, 30-39.9,  $\geq 40$ ), cohort-specific physical activity z score, alcohol intake (gram), hormone therapy (y/n), fruits, legumes, potatoes, other vegetables excluding legumes and potatoes, nuts and seeds, whole grains, refined grains, low-fat dairy products, high-fat dairy products, sugar-sweetened beverages, eggs, processed meat, processed meat squared, unprocessed red meat, and poultry, where relevant.

<sup>b</sup> Fasting glucose  $\geq 126$  mg/dL or HbA1c  $\geq 6.5\%$  or taking glucose-lowering drugs.

<sup>c</sup> Blood pressure  $\geq 140/90$  mm Hg or taking antihypertensive drugs.

<sup>d</sup> Total cholesterol  $\geq 240$  mg/dL or taking lipid-lowering drugs.

<sup>e</sup> Low density lipoprotein cholesterol  $< 70$  mg/dL or non-high density lipoprotein cholesterol  $< 100$  mg/dL, among those who did not take lipid-lowering drugs.

<sup>f</sup> Alternate Healthy Eating Index 2010 score in the highest quartile (a score of 51.1 or higher). The original version of the aHEI-2010 score has a range of 0-110 points. The aHEI-2010 score in this study had a range of 0-100 points due to the removal of the meat item.

<sup>g</sup> Percent of energy consumed from saturated fat in the highest quartile (14% or higher).

<sup>h</sup> Percent of energy consumed from saturated fat  $< 7\%$ .

<sup>i</sup> Percent of energy consumed from fat in the highest quartile (37.9% or higher).

<sup>j</sup> Percent of energy consumed from protein in the highest quartile (18.9% or higher).

<sup>k</sup> Percent of energy consumed from carbohydrates in the highest quartile (55.4% or higher).

eFigure 5. Association between each additional 2 servings of processed meat consumed per week and all-cause mortality among different subgroups

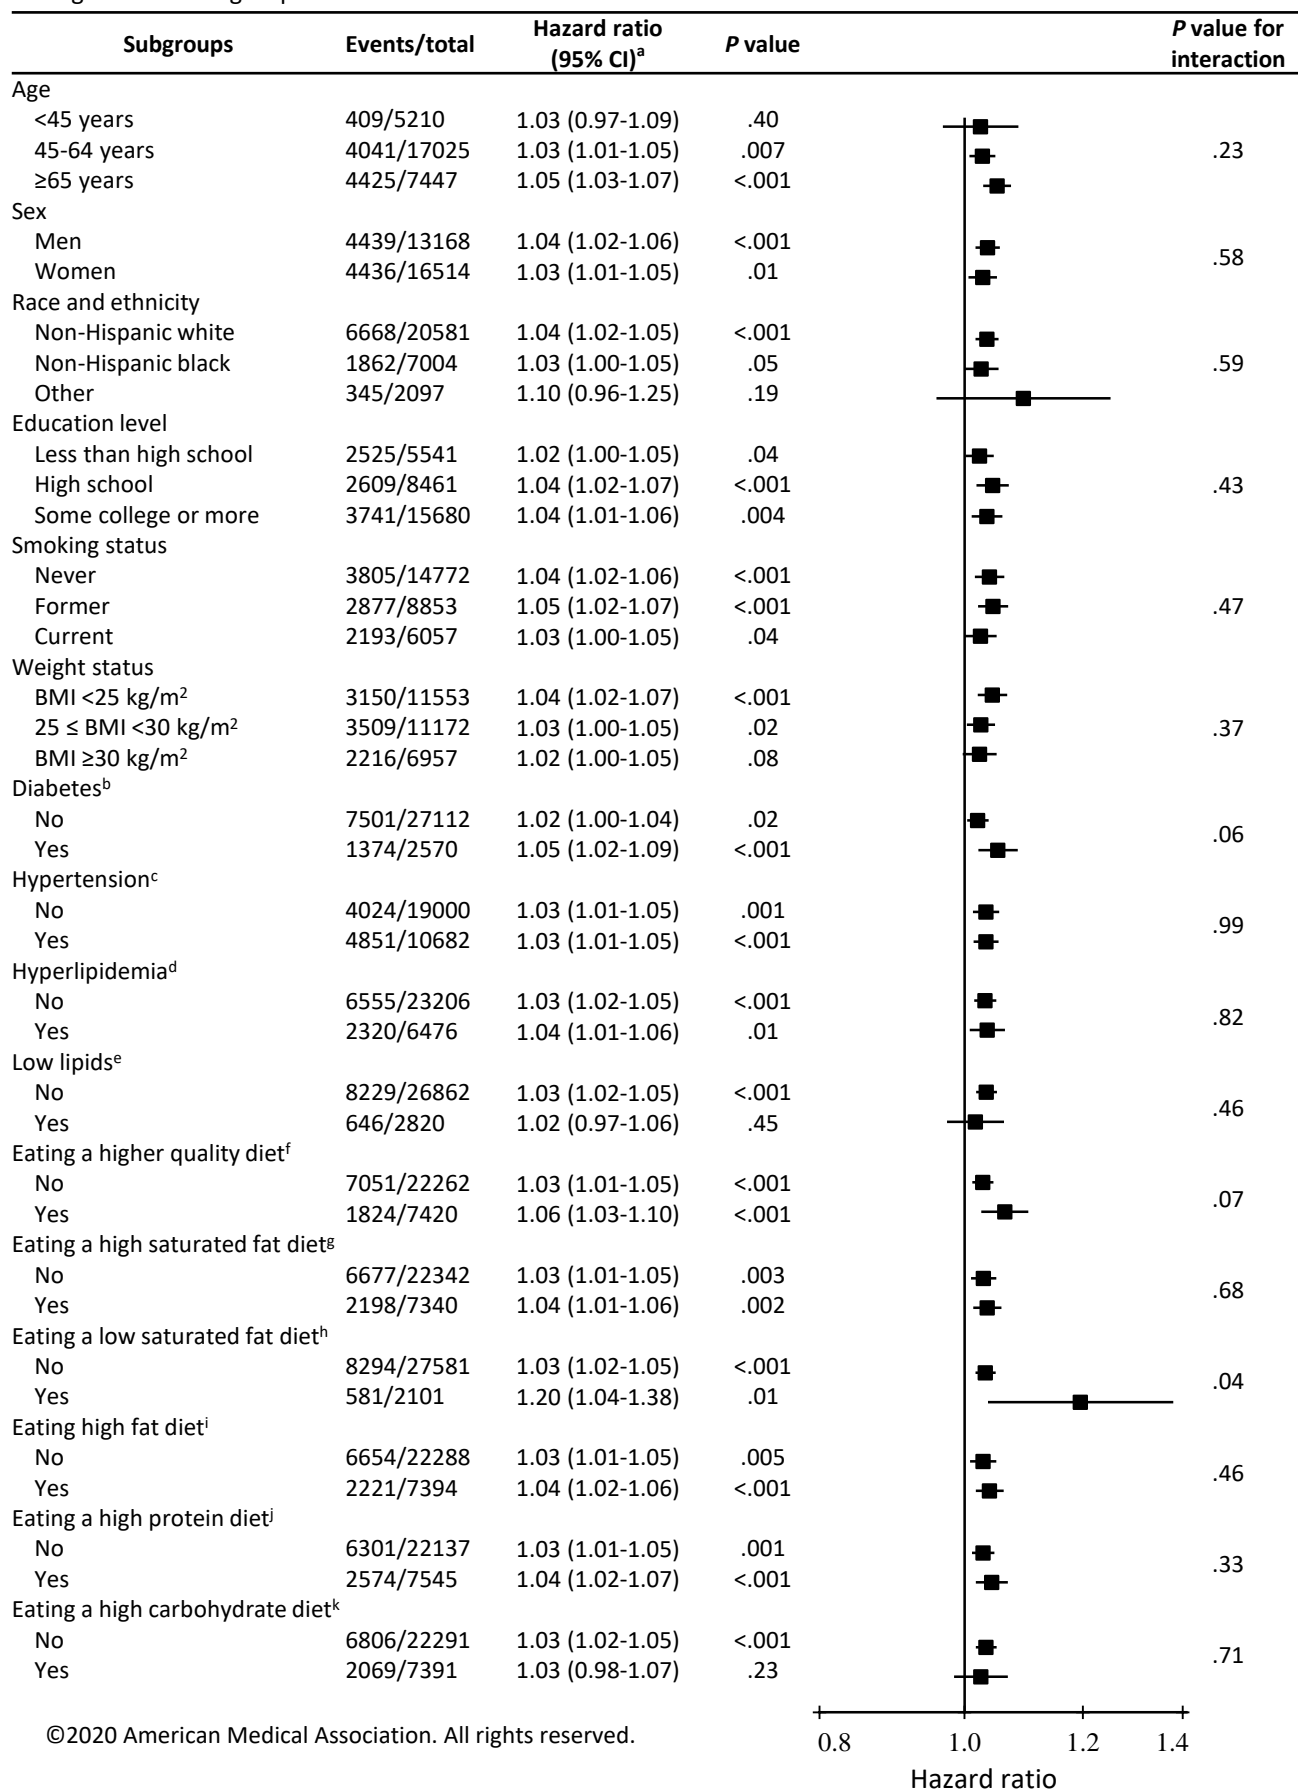

BMI, body mass index; CI, confidence interval.

<sup>a</sup> Cohort-stratified standard proportional hazards models were used. Adjustment covariates included age, sex, race and ethnicity (non-Hispanic white, non-Hispanic black, Hispanic, Chinese, other), education (<high school, high school, some college or more), total energy, smoking status (current, former, never), smoking pack-years (0, 0.1-4.9, 5.0-9.9, 10-19.9, 20-29.9, 30-39.9,  $\geq 40$ ), cohort-specific physical activity z score, alcohol intake (gram), hormone therapy (y/n), fruits, legumes, potatoes, other vegetables excluding legumes and potatoes, nuts and seeds, whole grains, refined grains, low-fat dairy products, high-fat dairy products, sugar-sweetened beverages, eggs, unprocessed red meat, poultry, and fish, where relevant. Models were further stratified by age groups, sex, and race and ethnicity to satisfy proportional hazards assumption.

<sup>b</sup> Fasting glucose  $\geq 126$  mg/dL or HbA1c  $\geq 6.5\%$  or taking glucose-lowering drugs.

<sup>c</sup> Blood pressure  $\geq 140/90$  mm Hg or taking antihypertensive drugs.

<sup>d</sup> Total cholesterol  $\geq 240$  mg/dL or taking lipid-lowering drugs.

<sup>e</sup> Low density lipoprotein cholesterol  $< 70$  mg/dL or non-high density lipoprotein cholesterol  $< 100$  mg/dL, among those who did not take lipid-lowering drugs.

<sup>f</sup> Alternate Healthy Eating Index 2010 score in the highest quartile (a score of 51.1 or higher). The original version of the aHEI-2010 score has a range of 0-110 points. The aHEI-2010 score in this study had a range of 0-100 points due to the removal of the meat item.

<sup>g</sup> Percent of energy consumed from saturated fat in the highest quartile (14% or higher).

<sup>h</sup> Percent of energy consumed from saturated fat  $< 7\%$ .

<sup>i</sup> Percent of energy consumed from fat in the highest quartile (37.9% or higher).

<sup>j</sup> Percent of energy consumed from protein in the highest quartile (18.9% or higher).

<sup>k</sup> Percent of energy consumed from carbohydrates in the highest quartile (55.4% or higher).

eFigure 6. Association between each additional 2 servings of unprocessed red meat consumed per week and all-cause mortality among different subgroups

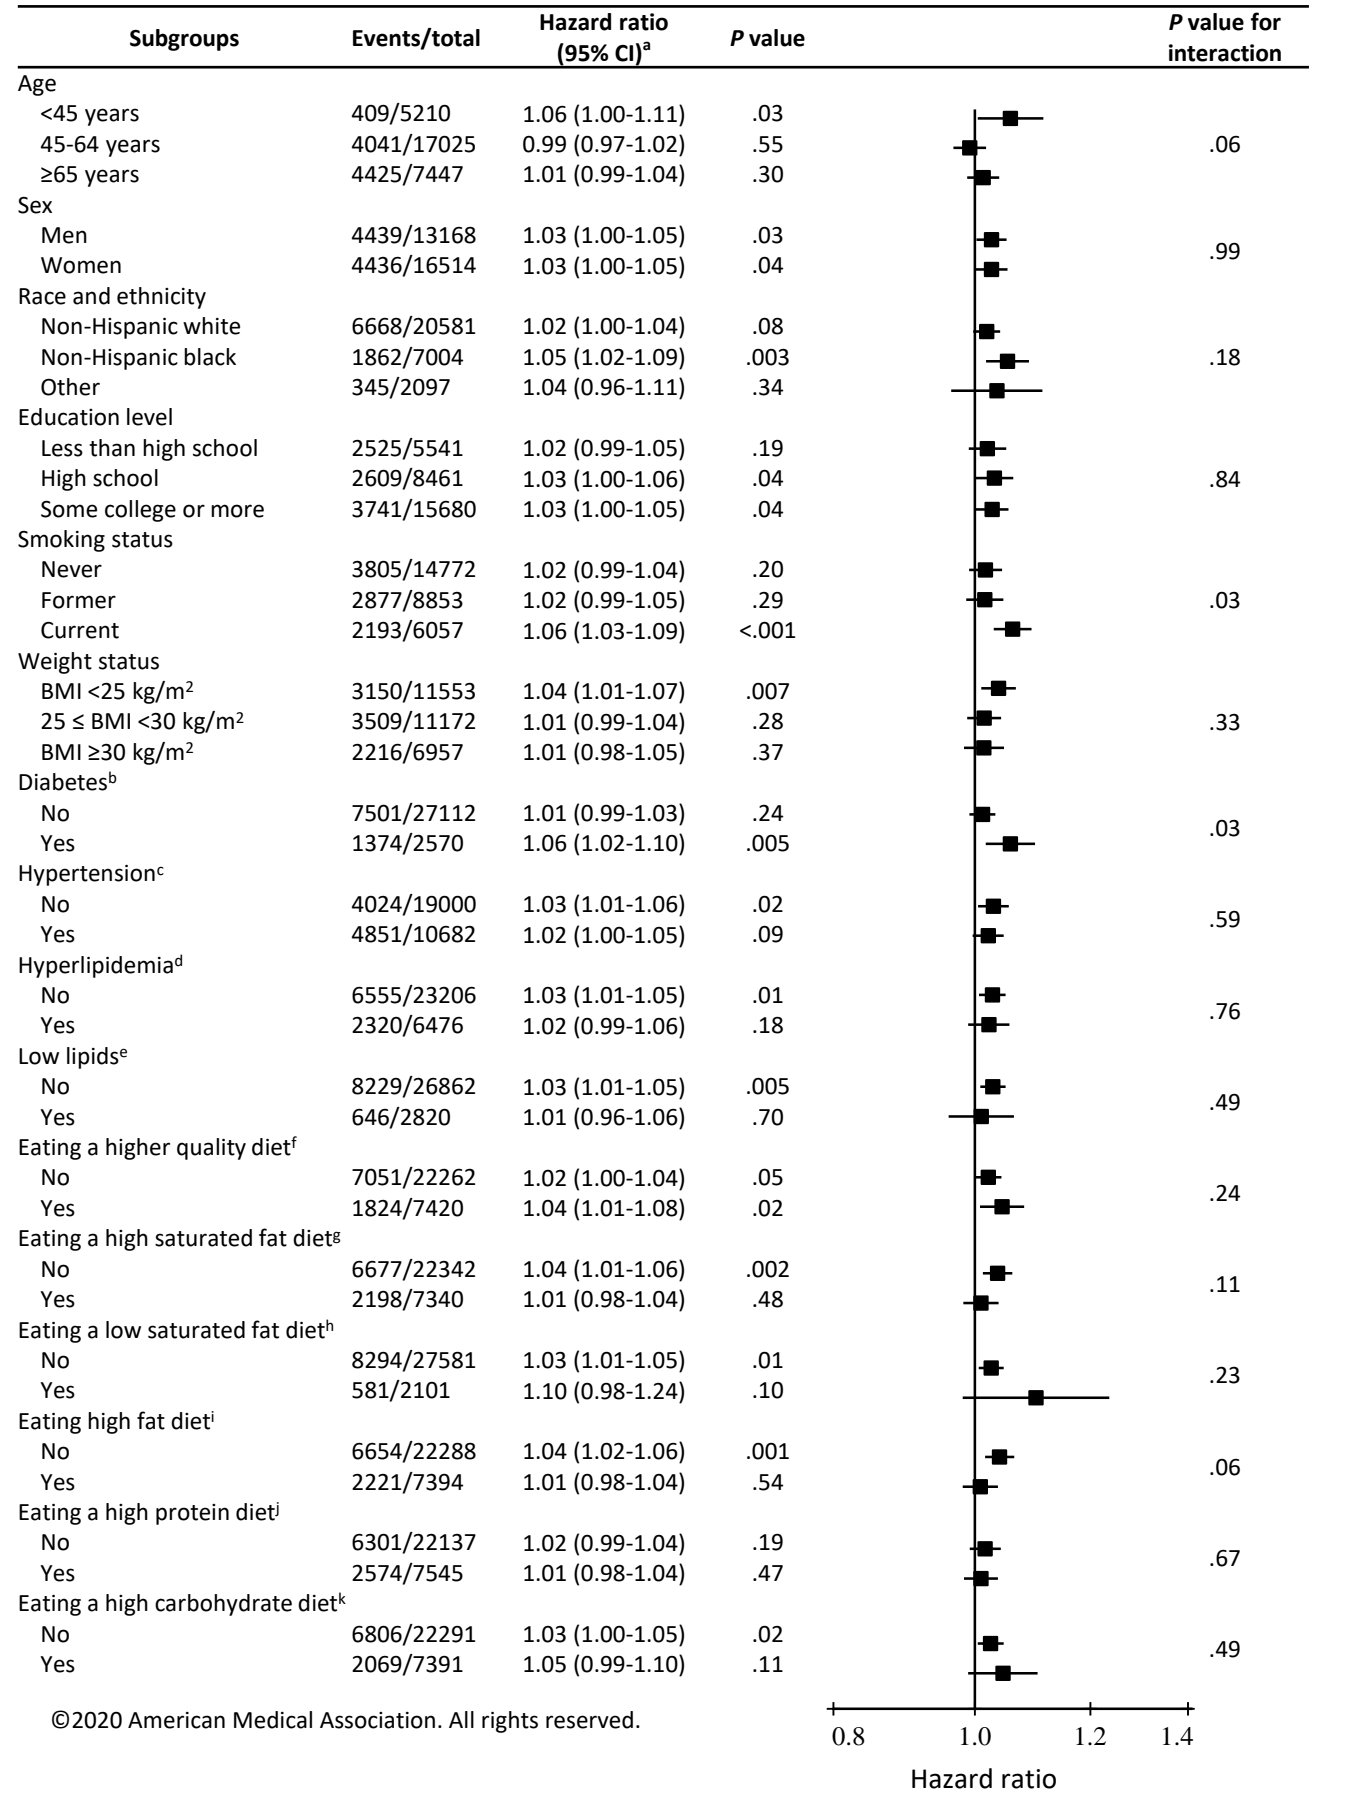

BMI, body mass index; CI, confidence interval.

<sup>a</sup> Cohort-stratified standard proportional hazards models were used. Adjustment covariates included age, sex, race and ethnicity (non-Hispanic white, non-Hispanic black, Hispanic, Chinese, other), education (<high school, high school, some college or more), total energy, smoking status (current, former, never), smoking pack-years (0, 0.1-4.9, 5.0-9.9, 10-19.9, 20-29.9, 30-39.9, ≥40), cohort-specific physical activity z score, alcohol intake (gram), hormone therapy (y/n), fruits, legumes, potatoes, other vegetables excluding legumes and potatoes, nuts and seeds, whole grains, refined grains, low-fat dairy products, high-fat dairy products, sugar-sweetened beverages, eggs, processed meat, poultry, and fish, where relevant. Models were further stratified by sex to satisfy proportional hazards assumption.

<sup>b</sup> Fasting glucose ≥126 mg/dL or HbA1c ≥6.5% or taking glucose-lowering drugs.

<sup>c</sup> Blood pressure ≥140/90 mm Hg or taking antihypertensive drugs.

<sup>d</sup> Total cholesterol ≥240 mg/dL or taking lipid-lowering drugs.

<sup>e</sup> Low density lipoprotein cholesterol <70 mg/dL or non-high density lipoprotein cholesterol <100 mg/dL, among those who did not take lipid-lowering drugs.

<sup>f</sup> Alternate Healthy Eating Index 2010 score in the highest quartile (a score of 51.1 or higher). The original version of the aHEI-2010 score has a range of 0-110 points. The aHEI-2010 score in this study had a range of 0-100 points due to the removal of the meat item.

<sup>g</sup> Percent of energy consumed from saturated fat in the highest quartile (14% or higher).

<sup>h</sup> Percent of energy consumed from saturated fat <7%.

<sup>i</sup> Percent of energy consumed from fat in the highest quartile (37.9% or higher).

<sup>j</sup> Percent of energy consumed from protein in the highest quartile (18.9% or higher).

<sup>j</sup> Percent of energy consumed from carbohydrates in the highest quartile (55.4% or higher).

eFigure 7. Association between each additional 2 servings of poultry consumed per week and all-cause mortality among different subgroups

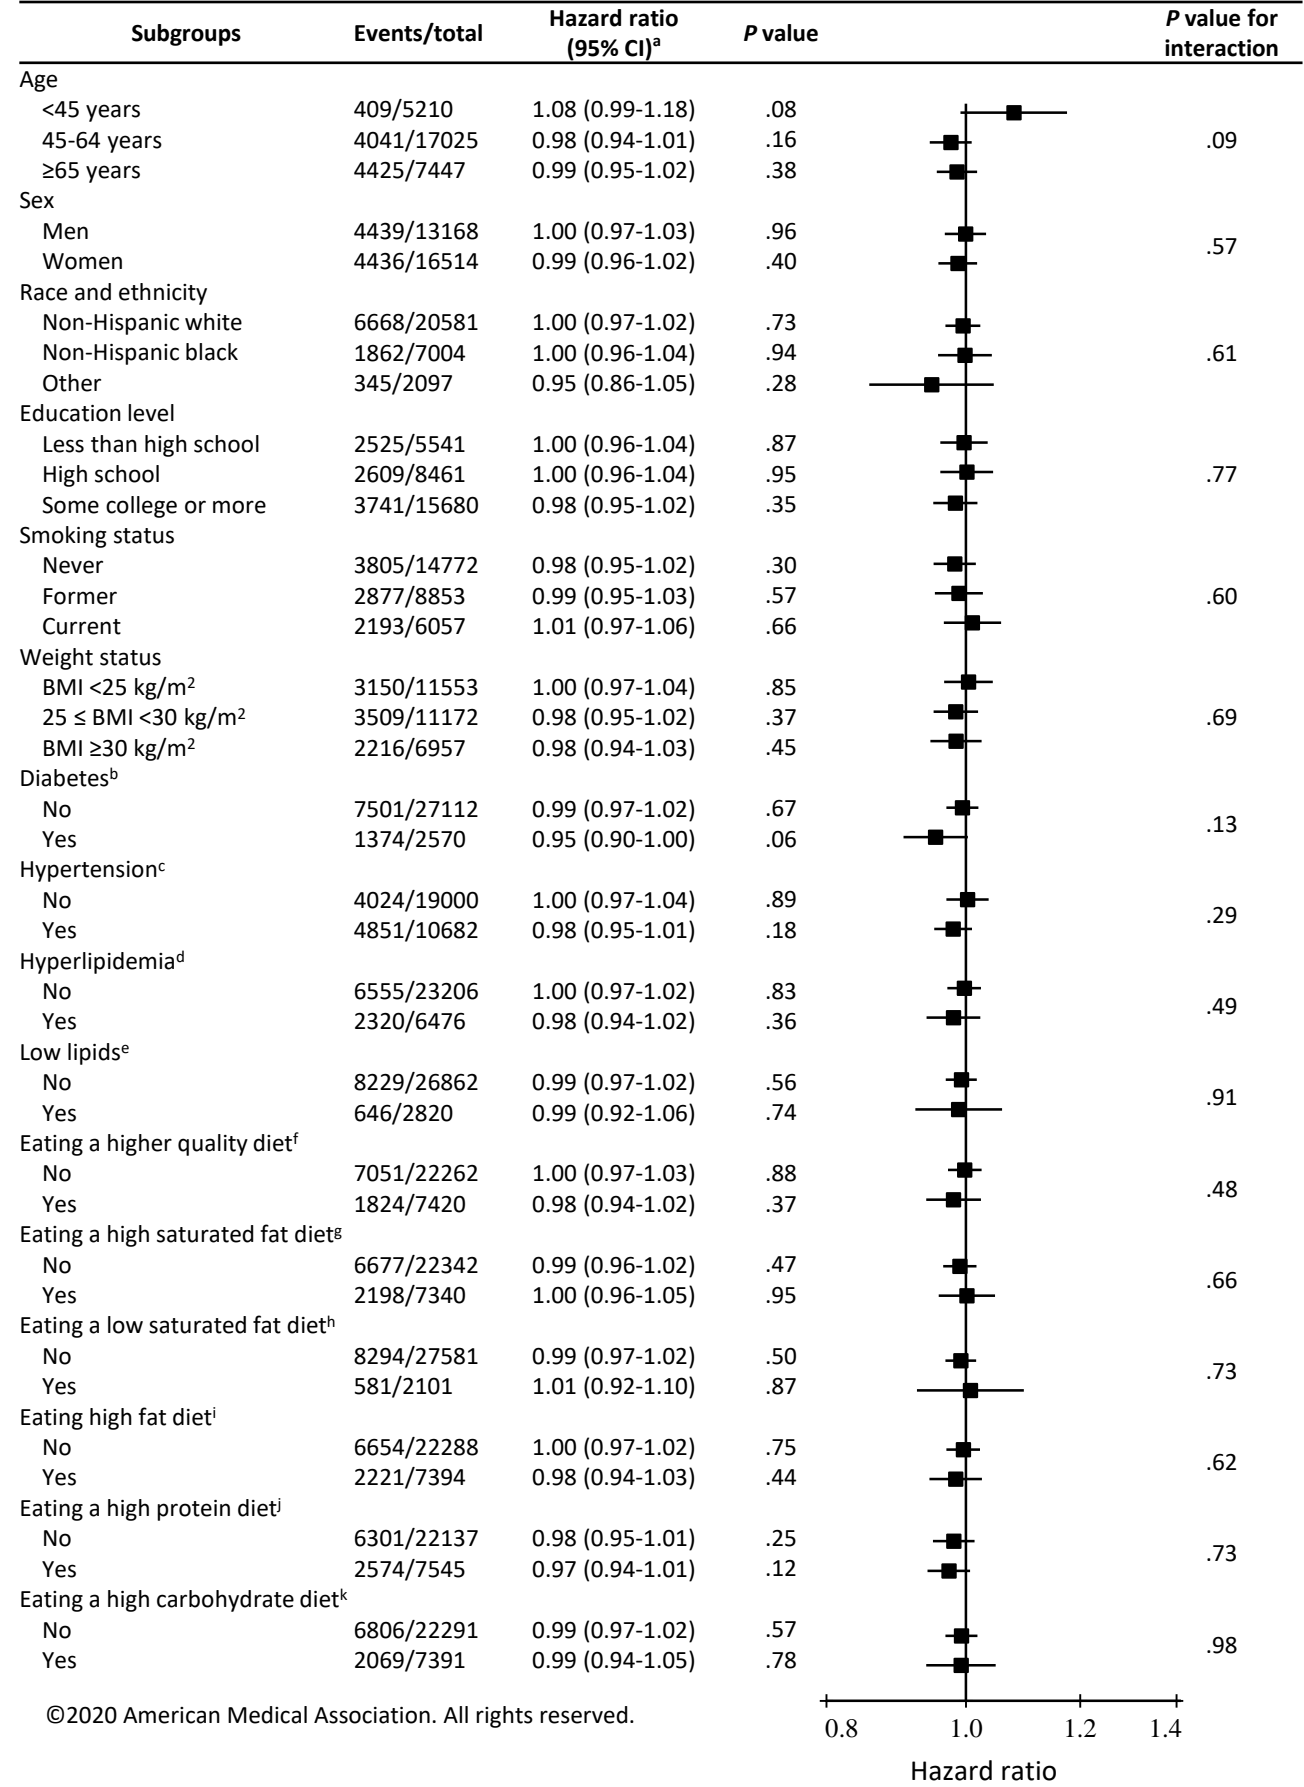

BMI, body mass index; CI, confidence interval.

<sup>a</sup> Cohort-stratified standard proportional hazards models were used. Adjustment covariates included age, sex, race and ethnicity (non-Hispanic white, non-Hispanic black, Hispanic, Chinese, other), education (<high school, high school, some college or more), total energy, smoking status (current, former, never), smoking pack-years (0, 0.1-4.9, 5.0-9.9, 10-19.9, 20-29.9, 30-39.9, ≥40), cohort-specific physical activity z score, alcohol intake (gram), hormone therapy (y/n), fruits, legumes, potatoes, other vegetables excluding legumes and potatoes, nuts and seeds, whole grains, refined grains, low-fat dairy products, high-fat dairy products, sugar-sweetened beverages, eggs, unprocessed red meat, processed meat, and fish, where relevant.

<sup>b</sup> Fasting glucose ≥126 mg/dL or HbA1c ≥6.5% or taking glucose-lowering drugs.

<sup>c</sup> Blood pressure ≥140/90 mm Hg or taking antihypertensive drugs.

<sup>d</sup> Total cholesterol ≥240 mg/dL or taking lipid-lowering drugs.

<sup>e</sup> Low density lipoprotein cholesterol <70 mg/dL or non-high density lipoprotein cholesterol <100 mg/dL, among those who did not take lipid-lowering drugs.

<sup>f</sup> Alternate Healthy Eating Index 2010 score in the highest quartile (a score of 51.1 or higher). The original version of the aHEI-2010 score has a range of 0-110 points. The aHEI-2010 score in this study had a range of 0-100 points due to the removal of the meat item.

<sup>g</sup> Percent of energy consumed from saturated fat in the highest quartile (14% or higher).

<sup>h</sup> Percent of energy consumed from saturated fat <7%.

<sup>i</sup> Percent of energy consumed from fat in the highest quartile (37.9% or higher).

<sup>j</sup> Percent of energy consumed from protein in the highest quartile (18.9% or higher).

<sup>j</sup> Percent of energy consumed from carbohydrates in the highest quartile (55.4% or higher).

eFigure 8. Association between each additional 2 servings of fish consumed per week and all-cause mortality among different subgroups

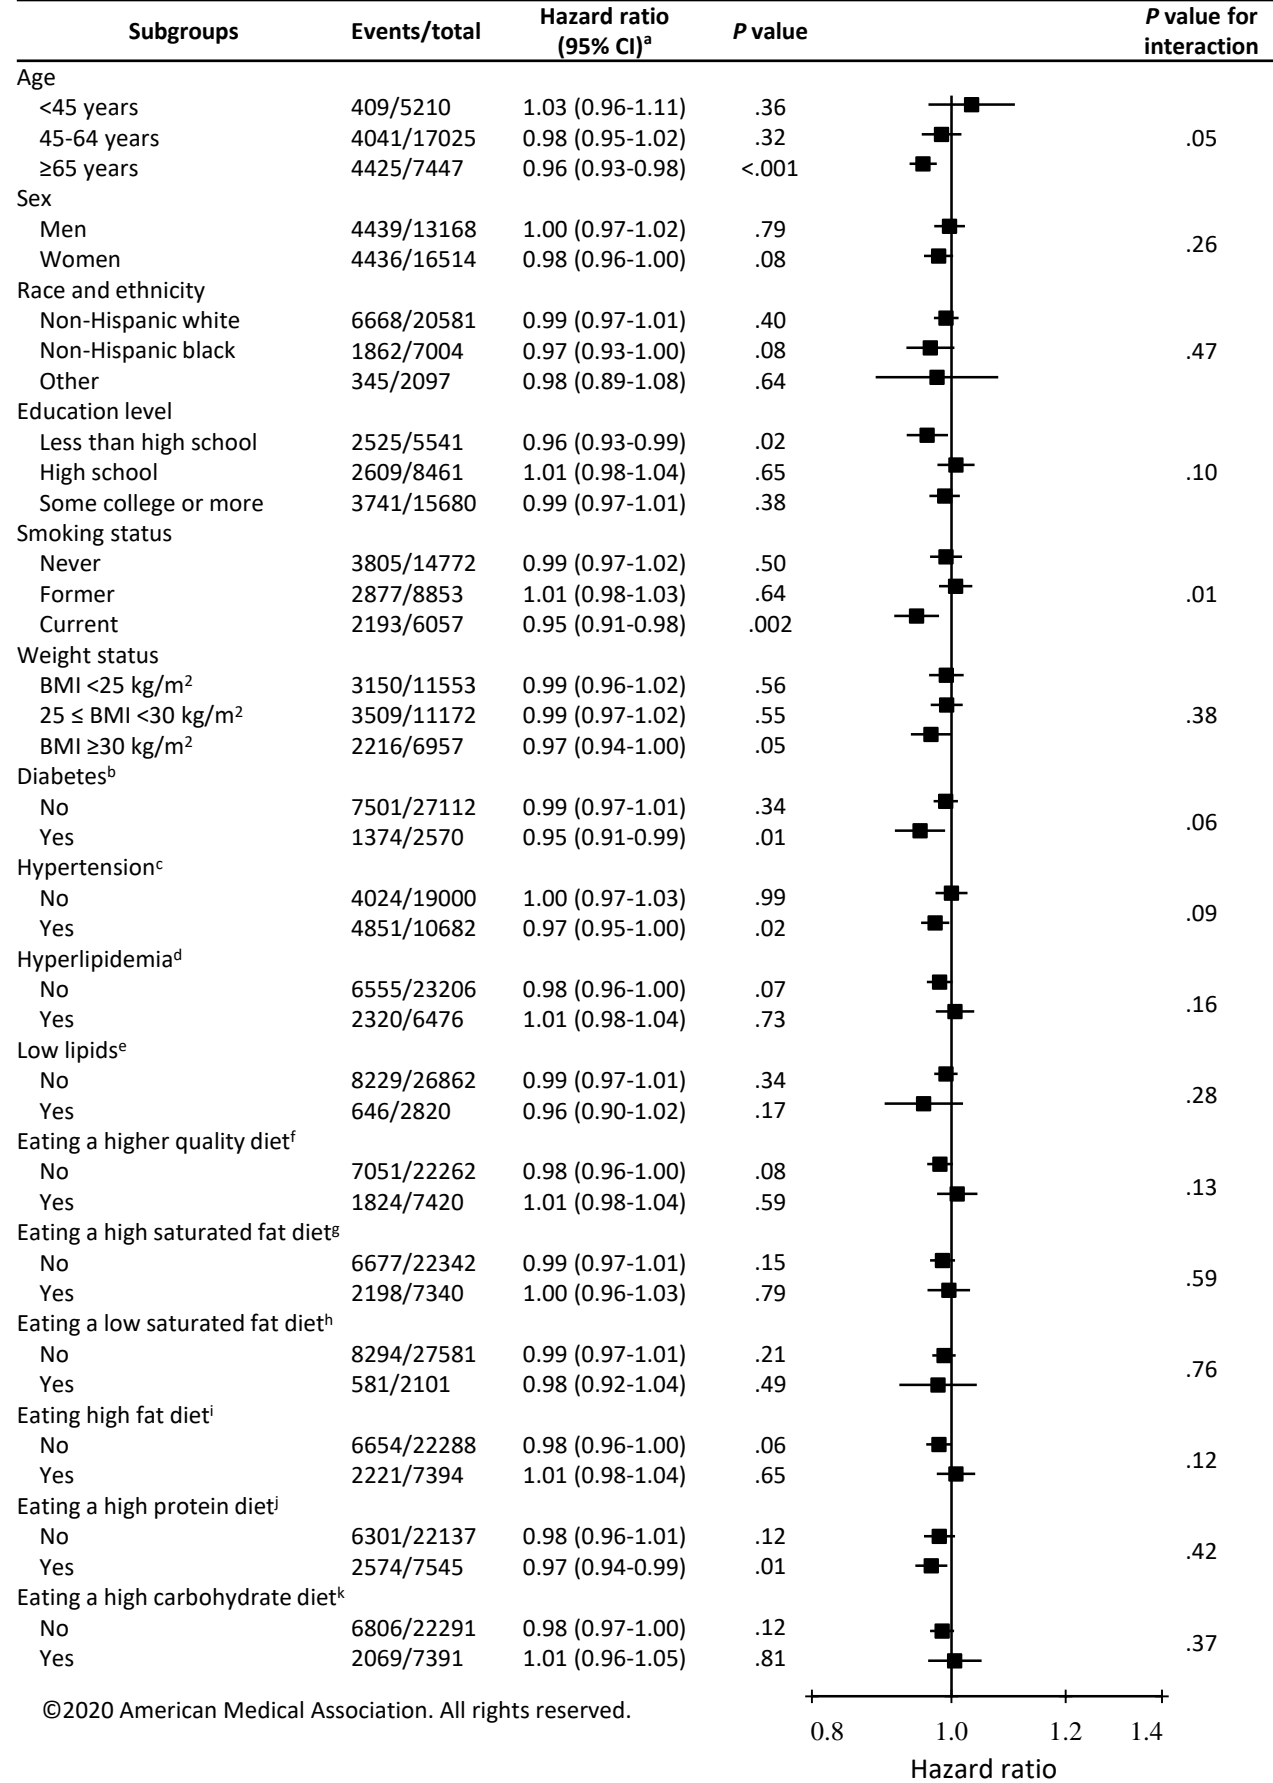

BMI, body mass index; CI, confidence interval.

<sup>a</sup> Cohort-stratified standard proportional hazards models were used. Adjustment covariates included age, sex, race and ethnicity (non-Hispanic white, non-Hispanic black, Hispanic, Chinese, other), education (<high school, high school, some college or more), total energy, smoking status (current, former, never), smoking pack-years (0, 0.1-4.9, 5.0-9.9, 10-19.9, 20-29.9, 30-39.9, ≥40), cohort-specific physical activity z score, alcohol intake (gram), hormone therapy (y/n), fruits, legumes, potatoes, other vegetables excluding legumes and potatoes, nuts and seeds, whole grains, refined grains, low-fat dairy products, high-fat dairy products, sugar-sweetened beverages, eggs, unprocessed red meat, processed meat, and poultry, where relevant.

<sup>b</sup> Fasting glucose ≥126 mg/dL or HbA1c ≥6.5% or taking glucose-lowering drugs.

<sup>c</sup> Blood pressure ≥140/90 mm Hg or taking antihypertensive drugs.

<sup>d</sup> Total cholesterol ≥240 mg/dL or taking lipid-lowering drugs.

<sup>e</sup> Low density lipoprotein cholesterol <70 mg/dL or non-high density lipoprotein cholesterol <100 mg/dL, among those who did not take lipid-lowering drugs.

<sup>f</sup> Alternate Healthy Eating Index 2010 score in the highest quartile (a score of 51.1 or higher). The original version of the aHEI-2010 score has a range of 0-110 points. The aHEI-2010 score in this study had a range of 0-100 points due to the removal of the meat item.

<sup>g</sup> Percent of energy consumed from saturated fat in the highest quartile (14% or higher).

<sup>h</sup> Percent of energy consumed from saturated fat <7%.

<sup>i</sup> Percent of energy consumed from fat in the highest quartile (37.9% or higher).

<sup>j</sup> Percent of energy consumed from protein in the highest quartile (18.9% or higher).

<sup>k</sup> Percent of energy consumed from carbohydrates in the highest quartile (55.4% or higher).
